# Supplementary material
Source: PubMed Central journal article supplement (PMC3125408)

## **Supplementary Information**

### **Subspecific origin and haplotype diversity in the laboratory mouse**

Hyuna Yang, Jeremy R Wang, John P Didion, Ryan J Buus, Timothy A Bell, Catherine E Welsh, François Bonhomme, Alex Hon-Tsen Yu, Michael W Nachman, Jaroslav Pialek, Priscilla Tucker, Pierre Boursot, Leonard McMillan, Gary A Churchill & Fernando Pardo-Manuel de Villena

## Supplementary Tables

### Supplementary Table 2. Heterozygosity in strains from the Jackson Laboratory.

Strains known to be maintained segregating for specific loci were used to validate our results.

| Strain               | Chromosome                                      | Size          | Gene                                          |
|----------------------|-------------------------------------------------|---------------|-----------------------------------------------|
| NZL/LtJ              | 4                                               | 2,098,542     |                                               |
| 129X1/SvJ            | 7                                               | 2,168,841     | Tyroxinase                                    |
| SSL/LeJ              | 14                                              | 5,066,720     | Piebald lethal ( <i>Ednrb<sup>S-1</sup></i> ) |
| DLS/LeJ              | 9                                               | 2,573,922     | Dilute lethal ( <i>Myo5a<sup>d-1</sup></i> )  |
| STX/Le               | 18                                              | 5,930,531     | <i>Twiler &amp; extra-toes</i>                |
| ZRDCT<br>Rax+/ChUmdJ | 1,4,15                                          | 10,442,495    |                                               |
| RBB/DnJ              | 2,18                                            | 16,066,083    |                                               |
| TKDU/DnJ             | 9                                               | 21,304,291    | Tk and ducky ( <i>Cacna2d2<sup>du</sup></i> ) |
| CALB/RkJ             | 2,3,7                                           | 22,841,024    |                                               |
| POHN/Dh              | 2,7,8,11,18                                     | 27,284,945    |                                               |
| PN/nBSWUmaDJ         | 2,5                                             | 54,028,495    |                                               |
| MOR/RkJ              | 1,2,3,4,5,6,7,8,9,10,11,12,13,14,15,16,17,18,19 | 1,296,933,687 |                                               |

**Supplementary Table 3.** Summary of large deletions. The table provides the name, chromosome, start and end of the deletion.

| Strain       | chr | Start     | End       |
|--------------|-----|-----------|-----------|
| 129T2/SvEmsJ | 7   | 26789546  | 26983059  |
| 22MO         | 16  | 58785367  | 59162675  |
| 22MO         | 17  | 92003261  | 92194164  |
| A/J          | 16  | 3498121   | 3663403   |
| A/WySnJ      | 16  | 3498121   | 3663403   |
| AEJ/GnLeJ    | 10  | 31337689  | 31828662  |
| ALR/LtJ      | 16  | 3498121   | 3663403   |
| ALS/LtJ      | 5   | 5976170   | 6110511   |
| BAG102       | 6   | 133567929 | 133716909 |
| BAG102       | 17  | 19096681  | 19565308  |
| BAG68        | 5   | 109513961 | 109622470 |
| BAG94        | 17  | 19097109  | 19533548  |

|                   |    |           |           |
|-------------------|----|-----------|-----------|
| BAG99             | 17 | 19097109  | 19565308  |
| BAG99             | 19 | 9442678   | 9738804   |
| BALB/cJ           | 12 | 90846986  | 90935079  |
| BIK/g             | 3  | 14316026  | 14495353  |
| BIK/g             | 7  | 112977147 | 113584719 |
| BIK/g             | 7  | 112975393 | 113403102 |
| BIK/g             | 19 | 13443934  | 13527543  |
| BUB/BnJ           | 5  | 5976170   | 6109939   |
| BULS              | 17 | 18829316  | 18947496  |
| BUSNA             | 1  | 5324073   | 5500583   |
| BUSNA             | 5  | 109824615 | 109979078 |
| BUSNA             | 17 | 19109122  | 19510071  |
| BZO               | 7  | 112977147 | 113584719 |
| C3HeB/FeJ         | 3  | 155954099 | 156073218 |
| C3HeB/FeJ         | 4  | 21067022  | 21256183  |
| C3HeB/FeJ         | 8  | 62320953  | 62553663  |
| C57BL/10J         | 4  | 36413198  | 36531554  |
| C57BL/10ScNJ      | 4  | 66476208  | 66541144  |
| C57BLKS/J         | 14 | 39874746  | 40018597  |
| C57L/J            | 14 | 39874746  | 40018597  |
| CALB/RkJ          | 3  | 14316099  | 14495353  |
| CALB/RkJ          | 17 | 38954486  | 39143608  |
| CBA/CaJ           | 15 | 16116242  | 16295795  |
| CE/J              | 7  | 113045282 | 113388699 |
| CE/J              | 16 | 3498121   | 3663403   |
| CKS               | 17 | 38954486  | 39212402  |
| CZECHI/EiJ        | 17 | 19096681  | 19533548  |
| CZECHI/EiJ        | 17 | 38319087  | 38791623  |
| CZECHII/EiJ       | 17 | 18738050  | 18947496  |
| CZECHII/EiJ       | 17 | 19096681  | 19533548  |
| DBA/1J            | 9  | 27279421  | 27390452  |
| DCA               | 7  | 112975393 | 113469612 |
| DCP               | 4  | 121156931 | 121352149 |
| DCP               | 8  | 40278435  | 40331732  |
| DCP               | 8  | 40463107  | 40610661  |
| DCP               | 17 | 39024941  | 39508178  |
| DDO               | 17 | 39604477  | 39961048  |
| DDY/JclSidSeyFrkJ | 12 | 63967814  | 64288042  |
| DEB               | 7  | 112975393 | 113469612 |
| DEB               | 17 | 39024941  | 39508178  |
| DGA               | 1  | 104967032 | 105785077 |
| DGA               | 6  | 69712532  | 69877897  |
| DIK               | 7  | 112975393 | 113388699 |
| DJO               | 17 | 39024941  | 39375698  |
| DMZ               | 6  | 133253073 | 133361109 |
| DMZ               | 17 | 39024941  | 39508178  |
| DOT               | 2  | 54628242  | 54733214  |

|            |    |           |           |
|------------|----|-----------|-----------|
| IHOT2      | 15 | 17558592  | 17705803  |
| IN13       | 6  | 60178147  | 60353731  |
| IN13       | 6  | 133526024 | 133604193 |
| IN13       | 14 | 46798201  | 49126218  |
| IN13       | 17 | 38780263  | 39160050  |
| IN17       | 17 | 38515252  | 38906192  |
| IN17       | 17 | 38954486  | 39160050  |
| IN25       | 17 | 38680079  | 39160050  |
| IN34       | 6  | 133481479 | 133604193 |
| IN40       | 1  | 141498416 | 141761325 |
| IN40       | 17 | 38954486  | 39159773  |
| IN47       | 17 | 38954486  | 39160050  |
| IN54       | 17 | 38954486  | 39160050  |
| IN59       | 17 | 38954486  | 39160050  |
| IN60       | 17 | 38954486  | 39160050  |
| IS/CamRkJ  | 7  | 112977147 | 113584093 |
| IS/CamRkJ  | 11 | 13875124  | 14924150  |
| JF1/Ms     | 17 | 19097109  | 19565308  |
| KCT222     | 17 | 39604477  | 40017129  |
| LEWES/EiJ  | 6  | 79531120  | 79621729  |
| LEWES/EiJ  | 7  | 101371747 | 101504333 |
| LEWES/EiJ  | 11 | 17875185  | 17942535  |
| MBK        | 3  | 91003481  | 91264911  |
| MBK        | 17 | 18736416  | 18947496  |
| MBK        | 17 | 19096681  | 19533548  |
| MBK        | 19 | 9442678   | 9738804   |
| MBS        | 17 | 18736416  | 18947496  |
| MBS        | 17 | 19096681  | 19533548  |
| MBS        | 19 | 9442678   | 9738804   |
| MCZ        | 17 | 18736416  | 18947496  |
| MCZ        | 17 | 19096681  | 19533548  |
| MDH        | 5  | 109513961 | 109622470 |
| MDH        | 12 | 116517871 | 117101462 |
| MGA        | 17 | 18829316  | 18947496  |
| MH         | 3  | 91003481  | 91264911  |
| MH         | 17 | 19203820  | 19533548  |
| MPB        | 5  | 109513961 | 109622470 |
| MPB        | 17 | 18736416  | 18947496  |
| MPB        | 17 | 19096681  | 19533548  |
| MSM/Ms     | 5  | 88533676  | 88729981  |
| MSM/Ms     | 17 | 19097109  | 19565308  |
| MWN1030    | 3  | 14316099  | 14495353  |
| MWN1214    | 5  | 57198805  | 57340535  |
| MWN1214    | 17 | 38344285  | 39235510  |
| MWN1287    | 7  | 130363157 | 137641892 |
| NOD/ShiLtJ | 5  | 5976170   | 6110511   |
| NOD/ShiLtJ | 5  | 46647683  | 46774817  |

|               |    |           |           |
|---------------|----|-----------|-----------|
| NON/ShiLtJ    | 12 | 35187221  | 35277533  |
| NONcNZO10/LtJ | 12 | 35187534  | 35248304  |
| NOR/LtJ       | 5  | 5976170   | 6110511   |
| NOR/LtJ       | 5  | 46660847  | 46774817  |
| NU/J          | 8  | 16720269  | 16809203  |
| NZB/BINJ      | 1  | 115024591 | 115117350 |
| NZL/LtJ       | 6  | 132282499 | 132333345 |
| NZO/HILtJ     | 6  | 132282499 | 132333345 |
| PERC/EiJ      | 6  | 124056934 | 124147282 |
| PERC/EiJ      | 7  | 113045282 | 113388699 |
| PERC/EiJ      | 17 | 38993969  | 39159350  |
| PWD/PhJ       | 17 | 19096681  | 19533548  |
| PWK/PhJ       | 17 | 19096681  | 19533548  |
| RBF/DnJ       | 6  | 133236873 | 133396417 |
| RBF/DnJ       | 14 | 85377044  | 85452559  |
| RBF/DnJ       | 17 | 39604477  | 40047429  |
| RDS10105      | 17 | 18829722  | 18947496  |
| RDS13554      | 17 | 18736416  | 18947496  |
| RDS13554      | 17 | 19096681  | 19533548  |
| RDS13554      | 17 | 38319087  | 38715993  |
| RHJ/LeJ       | 8  | 77896113  | 77998982  |
| RIIS/J        | 6  | 41077894  | 41156362  |
| RIIS/J        | 17 | 19815399  | 19994147  |
| SF/CamEiJ     | 17 | 11075251  | 11170687  |
| SF/CamEiJ     | 19 | 39578103  | 39818227  |
| SJL/Bm        | 7  | 81318066  | 82154023  |
| SKIVE/EiJ     | 5  | 109513961 | 109622470 |
| SKIVE/EiJ     | 12 | 116517871 | 117101462 |
| SKIVE/EiJ     | 14 | 90734253  | 96127574  |
| SKIVE/EiJ     | 17 | 19194273  | 19533548  |
| SOD1/EiJ      | 2  | 151012515 | 151252085 |
| SOD1/EiJ      | 6  | 60178147  | 60353731  |
| SOD1/EiJ      | 6  | 133253073 | 133381208 |
| STLT          | 6  | 68413276  | 68431196  |
| STLT          | 6  | 130735889 | 130776369 |
| STLT          | 17 | 38319087  | 38629680  |
| STRA          | 6  | 41077894  | 41155975  |
| STRA          | 6  | 60178147  | 60353731  |
| STRA          | 6  | 68413276  | 68431196  |
| STRA          | 6  | 130735889 | 130776369 |
| STRA          | 17 | 38319087  | 38704702  |
| STRB          | 6  | 41077894  | 41155975  |
| STRB          | 6  | 60178147  | 60353731  |
| STRB          | 6  | 68413276  | 68431196  |
| STRB          | 6  | 133236873 | 133396417 |
| STRB          | 17 | 38319087  | 38620190  |
| STUF          | 17 | 19203708  | 19533548  |

|             |    |           |           |
|-------------|----|-----------|-----------|
| STUP        | 3  | 91003481  | 91264911  |
| STUP        | 5  | 109824615 | 109979078 |
| STUP        | 10 | 128482322 | 128787461 |
| STUP        | 17 | 19203708  | 19448999  |
| STUP        | 17 | 38319087  | 38704702  |
| STUS        | 17 | 18736416  | 18947496  |
| STUS        | 17 | 19096681  | 19533548  |
| TIRANO/EiJ  | 17 | 39604477  | 39961048  |
| RDS12763    | 6  | 69103765  | 69310728  |
| WLA         | 6  | 41077894  | 41155975  |
| WLA         | 6  | 130735889 | 130776369 |
| WLA         | 10 | 78310446  | 78447275  |
| YBR/EiJ     | 3  | 14316099  | 14523993  |
| YBR/EiJ     | 6  | 133236873 | 133361109 |
| Yu2095m     | 17 | 19096681  | 19533548  |
| Yu2097m     | 2  | 86384203  | 86482107  |
| Yu2097m     | 17 | 19096681  | 19533548  |
| Yu2099f     | 17 | 19096681  | 19533548  |
| Yu2113m     | 17 | 19096681  | 19533548  |
| Yu2115m     | 19 | 9442678   | 9738804   |
| Yu2116m     | 3  | 91003481  | 91271991  |
| Yu2116m     | 19 | 9442678   | 9738804   |
| Yu2120f     | 17 | 19096681  | 19533548  |
| ZALENDE/EiJ | 6  | 60178147  | 60353731  |
| ZALENDE/EiJ | 6  | 133236873 | 133396417 |
| ZALENDE/EiJ | 17 | 39604514  | 40047429  |

**Supplementary Table 4.** Targeted resequencing of VINOs. The table provides the probes, strains and primer sequences

| JAX SNP ID      | Chromosome | RS Number  | SNP Type | SNP Position |
|-----------------|------------|------------|----------|--------------|
| JAX00241<br>414 | 1          | rs49515493 | C->G     | 8256154      |
| JAX00258<br>870 | 1          | rs38011870 | A->G     | 92712832     |
| JAX00518<br>420 | 3          | rs37921678 | T->C     | 30594534     |
| JAX00567<br>838 | 4          | rs27620154 | G->A     | 135478894    |
| JAX00149<br>491 | 7          | rs38180668 | T->C     | 27149947     |
| JAX00156<br>936 | 7          | rs33198758 | T->C     | 135288535    |

| JAX00642<br>397 | 7                             | rs33119893                    | C->A                         | 75763924                     |
|-----------------|-------------------------------|-------------------------------|------------------------------|------------------------------|
| JAX00649<br>359 | 7                             | rs51088408                    | A->G                         | 109702805                    |
| JAX00300<br>473 | 10                            | rs47495555                    | A->C                         | 120184726                    |
| JAX00031<br>437 | 11                            | rs27048205                    | A->G                         | 106181677                    |
| JAX00303<br>026 | 11                            | rs26931498                    | G->A                         | 5701725                      |
| JAX00376<br>696 | 14                            | rs46005263                    | G->A                         | 32912805                     |
| JAX00434<br>064 | 17                            | rs33779364                    | T->C                         | 25185359                     |
| JAX00442<br>587 | 17                            | rs47100906                    | A->G                         | 57648914                     |
| JAX00470<br>882 | 19                            | rs38205121                    | C->T                         | 12662282                     |
| JAX SNP<br>ID   | + Probe Seq.                  | - Probe Seq                   | + Primer Seq                 | - Primer Seq                 |
| JAX00241<br>414 | ACAAAGGTACCAA<br>AGACTATCAGAT | GTACCAAAGACTA<br>TCAGATAACCAT | GCAAGGTTTGAC<br>CCATGAGTTAGG | ATTACTTGTCTGA<br>CCACCAGGACC |
| JAX00258<br>870 | AGAGGTTGTTTCG<br>AACAAAGTCCAG | GTTGTTTCGAACA<br>AAGTCCAGAGAA | AATGAAGACCAG<br>GGAGGAGTCGAA | CCATCCAACCTCA<br>ATGCCATCCGA |
| JAX00518<br>420 | TTCAGGTCCATTT<br>CTAAGTCAAGAG | GGTCCATTTCTAA<br>GTCAAGAGGCAT | GGGAGACCTTAG<br>TGTAGGTCATTG | TAGGGTGCGGTAT<br>CTGAACACTTG |
| JAX00567<br>838 | AGGTACGTCGTCC<br>TGACCACAAAGC | GTACGTCGTCCTG<br>ACCACAAAGCAT | TCCAGTGCCTCC<br>ATCCATTCTTGA | TTCAAAGTCTGGG<br>AGTCCATCTGC |
| JAX00149<br>491 | CCTCTTTTTGAGTT<br>CATCTCAACC  | CGAACCCCTCT<br>TTTTGAGTTCAT   | GGGTGGAACAAT<br>GTGGAAGAACAG | AAGAAGAGGGAG<br>GATAGATCCCG  |
| JAX00156<br>936 | CTTCCAGTAAAAT<br>ATGCGGTGTACA | TCCAGTAAAATAT<br>GCGGTGTACACC | TCTAAGAGCCAG<br>AGTGGGAAGGTA | TCCTGTGGATTTG<br>CAAGCCTTCTG |
| JAX00642<br>397 | CTGGTATCGTGAT<br>TATCATTTTTGG | CTGGTATCGTGAT<br>TATCATTTTTGG | TCTACTGCTTTGG<br>CTTCTGGAGCA | TCAGCTTCATCCTT<br>GCAGCAACTC |
| JAX00649<br>359 | TGGGTATGGCACC<br>TTTTAACTACAC | GGTATGGCACCTT<br>TTAACTACACAG | AATGATTAGGGA<br>AGCCTAGGGCAG | GGAGGCTGCGTTC<br>TGCAATGATTA |
| JAX00300<br>473 | TTGTAAATACATA<br>GTTGCAAATCCA | CAGATTGTAAATA<br>CATAGTTGCAA  | AATTTGGGAAGC<br>AGAGCCAGGTTG | TGCTTGGACTION<br>TGGTCTTTCT  |
| JAX00031<br>437 | CATCTCGAAGTCA<br>TCCTCACAGAGG | CATCTCGAAGTCA<br>TCCTCACAGAGG | AGCTGCCATGAA<br>CTTCTCTCCAT  | AATATCAAGGGTG<br>ACTGCGGCAAC |
| JAX00303<br>026 | CATGGCCTTCCGA<br>ACCGTCTCTTCG | TCCGAACCGTCTC<br>TTCGTCTCCAG  | ACATGGTGGCTT<br>GGGATAGCTGTA | GCTATTCATGGAG<br>GGTGTCTCGT  |
| JAX00376<br>696 | ACCAGCGAGCTCC<br>TGTTTAAGGTAA | ACCAGCGAGCTCC<br>TGTTTAAGGTAA | CCCTCGAAACCT<br>CATCTTGATTGC | TACATCAGGCACT<br>TCGGCCATACT |
| JAX00434<br>064 | CAACAACAGTCCT<br>GATTCCAAAATC | AACAGTCCTGATT<br>CCAAAATCTACA | AGTCAGGTCCAA<br>GTCATCCAATGC | AGTAGGCACATGC<br>TGTTCTACCA  |
| JAX00442<br>587 | TTATTGGCTTTCA<br>CAATCGGAGTTT | ATTGGCTTTCACA<br>ATCGGAGTTTCA | GTGATGTGGCCA<br>CGTTCATTGTGT | ACTCACTGCATCC<br>CTAAAGCTGTG |
| JAX00470<br>882 | TGGTCAAACATCT<br>TTCGAGGGTCAG | TGGTCAAACATCT<br>TTCGAGGGTCAG | AGGTTGCAGCTG<br>AGCTACCAAAGA | TGCCCACTCACTT<br>GAATCTATGCC |

**Supplementary Table 5.** Regions with low SNP density in the Mouse Diversity array.

The table provides chromosome, start, end and size of these regions.

| Chr | St        | End       | Size    |
|-----|-----------|-----------|---------|
| 1   | 85038401  | 87557133  | 2518732 |
| 1   | 111607486 | 111711660 | 104174  |
| 1   | 119559242 | 119744063 | 184821  |
| 1   | 157953868 | 158106086 | 152218  |
| 1   | 184903124 | 185342097 | 438973  |
| 2   | 90136993  | 90239598  | 102605  |
| 2   | 100291153 | 100618204 | 327051  |
| 2   | 113708202 | 113826761 | 118559  |
| 2   | 172416868 | 172531498 | 114630  |
| 2   | 174769062 | 177833120 | 3064058 |
| 3   | 15318017  | 15673164  | 355147  |
| 3   | 64221856  | 64374779  | 152923  |
| 3   | 93569016  | 93817560  | 248544  |
| 3   | 98255367  | 98379481  | 124114  |
| 3   | 113038097 | 113236252 | 198155  |
| 4   | 3013031   | 3270810   | 257779  |
| 4   | 31381321  | 31659784  | 278463  |
| 4   | 41600463  | 42789171  | 1188708 |
| 4   | 60004031  | 61354910  | 1350879 |
| 4   | 111700710 | 112074888 | 374178  |
| 4   | 112576250 | 113820165 | 1243915 |
| 4   | 121308985 | 122241517 | 932532  |
| 4   | 130021854 | 130185532 | 163678  |
| 4   | 145000943 | 146709730 | 1708787 |
| 5   | 10807083  | 11885511  | 1078428 |
| 5   | 14907823  | 15184941  | 277118  |
| 5   | 25421340  | 26468179  | 1046839 |
| 5   | 93800488  | 96262456  | 2461968 |
| 5   | 143204048 | 143509964 | 305916  |
| 6   | 3001778   | 3130317   | 128539  |
| 6   | 47599746  | 47730360  | 130614  |
| 6   | 59521665  | 59914848  | 393183  |
| 6   | 69467728  | 69601696  | 133968  |
| 6   | 70306625  | 70447524  | 140899  |
| 6   | 114438359 | 114588610 | 150251  |
| 6   | 123334737 | 123584342 | 249605  |
| 7   | 3005336   | 3796246   | 790910  |
| 7   | 7200974   | 10593801  | 3392827 |
| 7   | 11418742  | 12041428  | 622686  |
| 7   | 15240532  | 16173489  | 932957  |
| 7   | 17840762  | 18181257  | 340495  |



|    |           |           |         |
|----|-----------|-----------|---------|
| 7  | 20658198  | 24074680  | 3416482 |
| 7  | 32329412  | 33973476  | 1644064 |
| 7  | 39102616  | 46555960  | 7453344 |
| 7  | 48768732  | 48994136  | 225404  |
| 7  | 50355668  | 50516611  | 160943  |
| 7  | 54844281  | 54976185  | 131904  |
| 7  | 66600125  | 67512311  | 912186  |
| 7  | 113103675 | 113378939 | 275264  |
| 8  | 53855     | 3083611   | 3029756 |
| 8  | 19705589  | 22566216  | 2860627 |
| 8  | 56192661  | 57917198  | 1724537 |
| 8  | 71976282  | 72107430  | 131148  |
| 9  | 80253144  | 80357752  | 104608  |
| 9  | 88499227  | 89068676  | 569449  |
| 10 | 21801884  | 22192453  | 390569  |
| 10 | 57560116  | 57670381  | 110265  |
| 10 | 81222936  | 81484838  | 261902  |
| 11 | 60374062  | 60506308  | 132246  |
| 12 | 17833851  | 18095965  | 262114  |
| 12 | 18463233  | 25052669  | 6589436 |
| 12 | 36427764  | 36597458  | 169694  |
| 12 | 42288898  | 42689946  | 401048  |
| 12 | 56190168  | 56355696  | 165528  |
| 12 | 84558819  | 84715185  | 156366  |
| 12 | 88960202  | 89267122  | 306920  |
| 12 | 90935079  | 91059705  | 124626  |
| 13 | 10987222  | 11175635  | 188413  |
| 13 | 12702166  | 13451347  | 749181  |
| 13 | 17985845  | 18164307  | 178462  |
| 13 | 22967465  | 23100721  | 133256  |
| 13 | 33419209  | 33527486  | 108277  |
| 13 | 61557678  | 61795283  | 237605  |
| 13 | 65406976  | 68567157  | 3160181 |
| 13 | 92136900  | 92796094  | 659194  |
| 14 | 3262706   | 8514187   | 5251481 |
| 14 | 20238815  | 20348997  | 110182  |
| 14 | 26694506  | 27115802  | 421296  |
| 14 | 42004463  | 45349671  | 3345208 |
| 14 | 52267986  | 52375663  | 107677  |
| 14 | 53761534  | 53961634  | 200100  |
| 14 | 119185827 | 119398904 | 213077  |
| 16 | 3158668   | 3426673   | 268005  |
| 16 | 68222339  | 68347499  | 125160  |
| 16 | 94119461  | 94366944  | 247483  |
| 17 | 6257979   | 6909183   | 651204  |
| 17 | 13434369  | 13649185  | 214816  |
| 17 | 15084369  | 15193544  | 109175  |

|    |           |           |          |
|----|-----------|-----------|----------|
| 17 | 17154611  | 17328797  | 174186   |
| 17 | 33274181  | 33377052  | 102871   |
| 17 | 35476061  | 35581130  | 105069   |
| 17 | 40047429  | 40289604  | 242175   |
| 17 | 62216801  | 62328562  | 111761   |
| 17 | 93303421  | 93533499  | 230078   |
| 18 | 3013018   | 3149782   | 136764   |
| 18 | 76627770  | 76770221  | 142451   |
| 19 | 6677985   | 6889166   | 211181   |
| 19 | 9237903   | 9378038   | 140135   |
| 19 | 39181023  | 39284915  | 103892   |
| 20 | 3054629   | 4894504   | 1839875  |
| 20 | 22815010  | 33248619  | 10433609 |
| 20 | 34701743  | 34983849  | 282106   |
| 20 | 51313749  | 53061669  | 1747920  |
| 20 | 71854875  | 71966052  | 111177   |
| 20 | 120024406 | 122716250 | 2691844  |
| 20 | 124350225 | 124500860 | 150635   |
| 20 | 131871707 | 132106216 | 234509   |
| 20 | 144104004 | 146550583 | 2446579  |
| 20 | 150500887 | 150602567 | 101680   |

**Supplementary Table 6.** Putative structural variation. The table provides the strain, chromosome, start and end.

| strain   | Chromosome | Start     | Position  |
|----------|------------|-----------|-----------|
| KK/HIJ   | 10         | 122132584 | 122289929 |
| MOLD/RkJ | 10         | 122132584 | 122289929 |
| MOLG/DnJ | 10         | 122132584 | 122289929 |
| DDK      | 10         | 122133030 | 122289929 |

## Supplementary Figures

**Supplementary Figure 1.** Geographical origin of the samples. For classical inbred strains we indicate the provider.

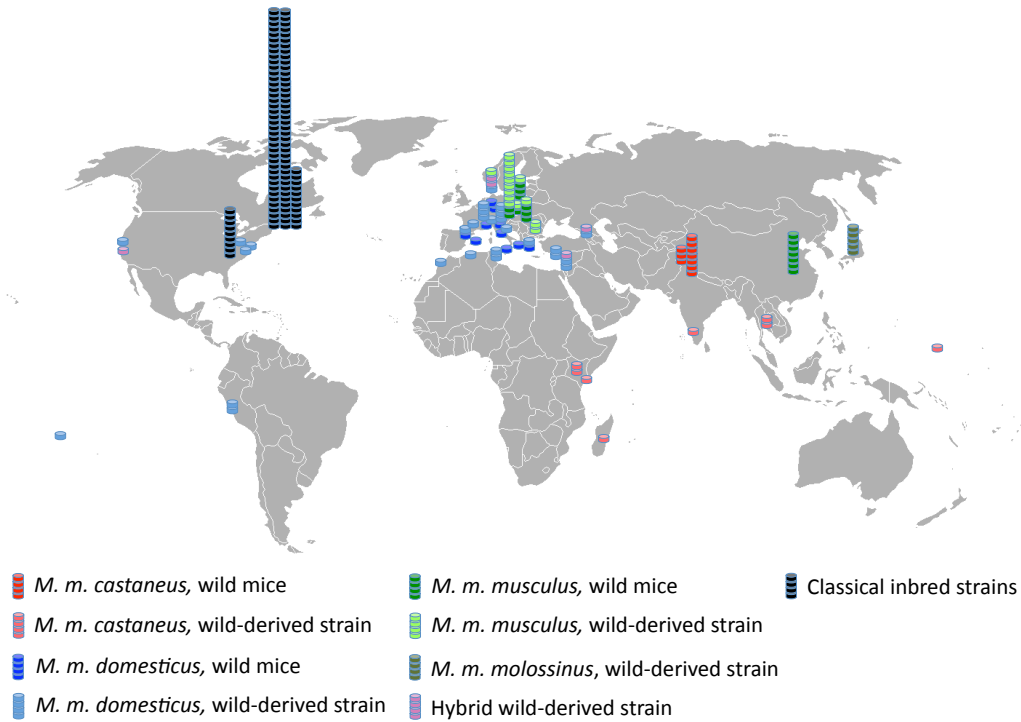

**Supplementary Figure 2.** Spatial distribution of SNPs and VINOs with informative alleles. Each vertical bar represent the number of informative SNPs and VINOs in 500kb windows for the *M. m. domesticus* (blue), *M. m. musculus* (red) and *M. m. castaneus* (green) subspecies. The black thick horizontal lines represent regions of the genome without SNP markers. Yellow bars represent the number of non-informative SNPs and VINOs.

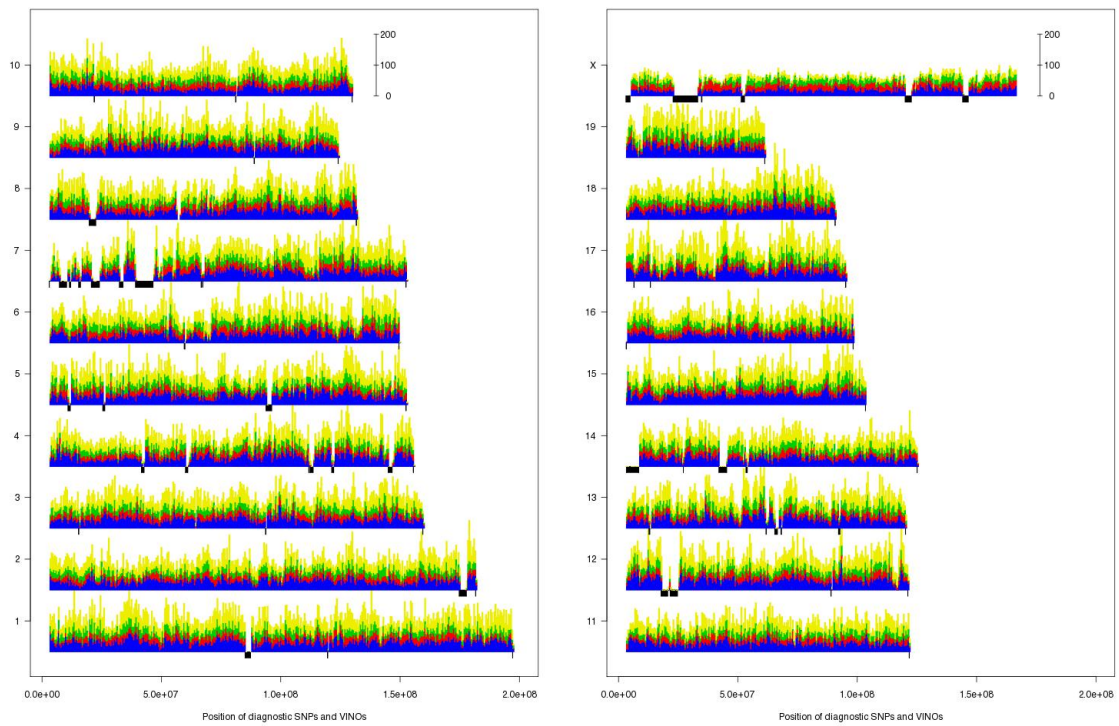

**Supplementary Figure 3.** Phylogenetic tree for wild caught samples based on VINO. The red, green and blue circles represent the basal node for the *M. m. musculus*, *M. m. castaneus* and *M. m. domesticus* subspecies, respectively.

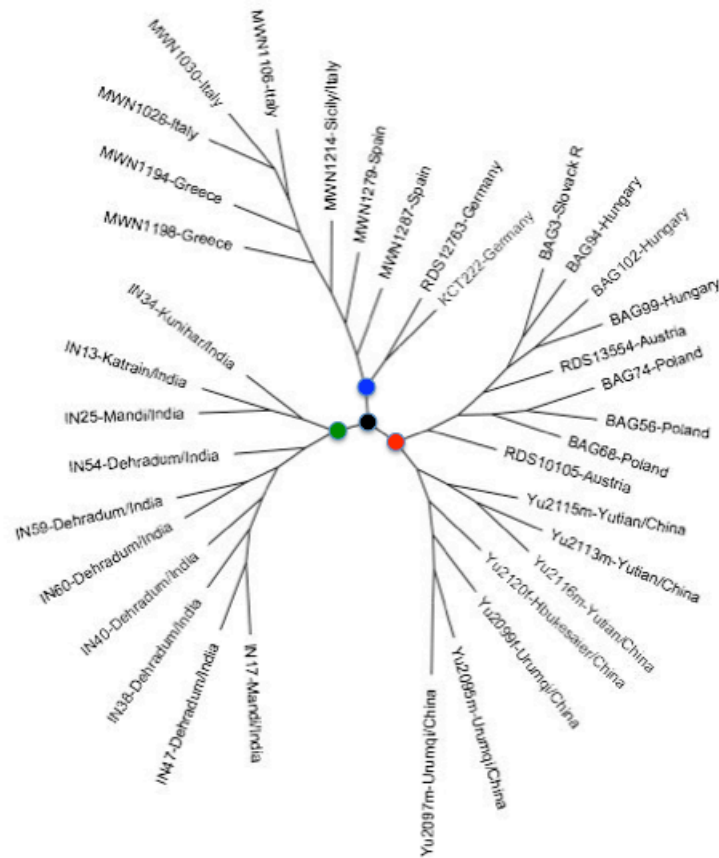

**Supplementary Figure 4.** Haplotype diversity and IBD in classical inbred strains. A) Number of haplotypes per compatible interval. B) Number of cliques per compatible interval. C) Proportion of the genome that is IBD in pairwise comparisons between classical strains.

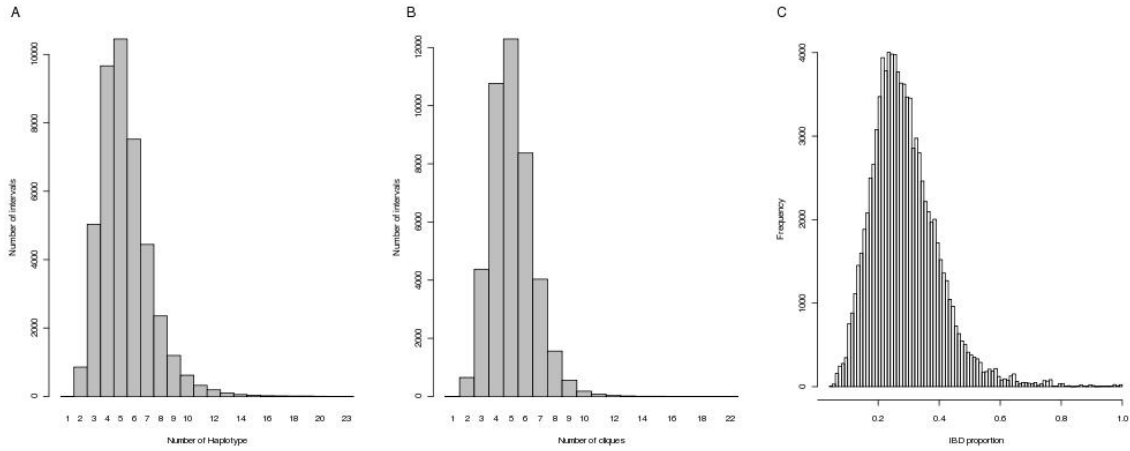

**Supplementary Figure 5.** IBD in sister strains. The figure classifies 13 sets of sister strains into three classes depending on the likely origin of the genetic diversity observed in each pair.

|                     | 129P1/ReJ | 129P3/J | 129S1/SvImJ | 129S6 | 129T2/SvEmsJ | 129X1/SvJ | A/J | A/WySnJ | AEJ/GnLeJ | AEJ/GnRk a[e]J/a[e] | BALB/cByJ | BALB/cJ | C3H/HeJ | C3HeB/FeJ | C57BL/10J | C57BL/10ScN | C57BL/10ScSn | C57BL/6CR | C57BL/6J | C57BL/6NC1 | C57BL/6Tc | CBA/CaJ | CBA/J | DBA/1J | DBA/1LacJ | DBA/2DeJ | DBA/2Ha5mnJ | DBA/2J | NON/ShiLtJ | NONchZO10/LtJ | NONchZO5/LtJ | SEC1GnLeJ | SEC1ReJ | SJL/Bm | SJL/J |    |    |    |    |
|---------------------|-----------|---------|-------------|-------|--------------|-----------|-----|---------|-----------|---------------------|-----------|---------|---------|-----------|-----------|-------------|--------------|-----------|----------|------------|-----------|---------|-------|--------|-----------|----------|-------------|--------|------------|---------------|--------------|-----------|---------|--------|-------|----|----|----|----|
| 129P1/ReJ           | 0         | 2       | 2           | 2     | 3            | 3         | NA  | NA      | NA        | NA                  | NA        | NA      | NA      | NA        | NA        | NA          | NA           | NA        | NA       | NA         | NA        | NA      | NA    | NA     | NA        | NA       | NA          | NA     | NA         | NA            | NA           | NA        | NA      | NA     | NA    | NA | NA | NA | NA |
| 129P3/J             | 0         | 0       | 2           | 2     | 2            | 3         | NA  | NA      | NA        | NA                  | NA        | NA      | NA      | NA        | NA        | NA          | NA           | NA        | NA       | NA         | NA        | NA      | NA    | NA     | NA        | NA       | NA          | NA     | NA         | NA            | NA           | NA        | NA      | NA     | NA    | NA | NA | NA | NA |
| 129S1/SvImJ         | 0         | 0       | 0           | 0     | 2            | 3         | NA  | NA      | NA        | NA                  | NA        | NA      | NA      | NA        | NA        | NA          | NA           | NA        | NA       | NA         | NA        | NA      | NA    | NA     | NA        | NA       | NA          | NA     | NA         | NA            | NA           | NA        | NA      | NA     | NA    | NA | NA | NA | NA |
| 129S6               | 0         | 0       | 0           | 0     | 0            | 2         | 3   | NA      | NA        | NA                  | NA        | NA      | NA      | NA        | NA        | NA          | NA           | NA        | NA       | NA         | NA        | NA      | NA    | NA     | NA        | NA       | NA          | NA     | NA         | NA            | NA           | NA        | NA      | NA     | NA    | NA | NA | NA | NA |
| 129T2/SvEmsJ        | 0         | 0       | 0           | 0     | 0            | 0         | 3   | NA      | NA        | NA                  | NA        | NA      | NA      | NA        | NA        | NA          | NA           | NA        | NA       | NA         | NA        | NA      | NA    | NA     | NA        | NA       | NA          | NA     | NA         | NA            | NA           | NA        | NA      | NA     | NA    | NA | NA | NA | NA |
| 129X1/SvJ           | 0         | 0       | 0           | 0     | 0            | 0         | 0   | NA      | NA        | NA                  | NA        | NA      | NA      | NA        | NA        | NA          | NA           | NA        | NA       | NA         | NA        | NA      | NA    | NA     | NA        | NA       | NA          | NA     | NA         | NA            | NA           | NA        | NA      | NA     | NA    | NA | NA | NA | NA |
| A/J                 | 0         | 0       | 0           | 0     | 0            | 0         | 0   | 0       | NA        | NA                  | NA        | NA      | NA      | NA        | NA        | NA          | NA           | NA        | NA       | NA         | NA        | NA      | NA    | NA     | NA        | NA       | NA          | NA     | NA         | NA            | NA           | NA        | NA      | NA     | NA    | NA | NA | NA | NA |
| A/WySnJ             | 0         | 0       | 0           | 0     | 0            | 0         | 0   | 0       | 0         | NA                  | NA        | NA      | NA      | NA        | NA        | NA          | NA           | NA        | NA       | NA         | NA        | NA      | NA    | NA     | NA        | NA       | NA          | NA     | NA         | NA            | NA           | NA        | NA      | NA     | NA    | NA | NA | NA | NA |
| AEJ/GnLeJ           | 0         | 0       | 0           | 0     | 0            | 0         | 0   | 0       | 0         | 0                   | NA        | NA      | NA      | NA        | NA        | NA          | NA           | NA        | NA       | NA         | NA        | NA      | NA    | NA     | NA        | NA       | NA          | NA     | NA         | NA            | NA           | NA        | NA      | NA     | NA    | NA | NA | NA | NA |
| AEJ/GnRk a[e]J/a[e] | 0         | 0       | 0           | 0     | 0            | 0         | 0   | 0       | 0         | 0                   | 0         | NA      | NA      | NA        | NA        | NA          | NA           | NA        | NA       | NA         | NA        | NA      | NA    | NA     | NA        | NA       | NA          | NA     | NA         | NA            | NA           | NA        | NA      | NA     | NA    | NA | NA | NA | NA |
| BALB/cByJ           | 0         | 0       | 0           | 0     | 0            | 0         | 0   | 0       | 0         | 0                   | 0         | 0       | NA      | NA        | NA        | NA          | NA           | NA        | NA       | NA         | NA        | NA      | NA    | NA     | NA        | NA       | NA          | NA     | NA         | NA            | NA           | NA        | NA      | NA     | NA    | NA | NA | NA | NA |
| BALB/cJ             | 0         | 0       | 0           | 0     | 0            | 0         | 0   | 0       | 0         | 0                   | 0         | 0       | 0       | NA        | NA        | NA          | NA           | NA        | NA       | NA         | NA        | NA      | NA    | NA     | NA        | NA       | NA          | NA     | NA         | NA            | NA           | NA        | NA      | NA     | NA    | NA | NA | NA | NA |
| C3H/HeJ             | 0         | 0       | 0           | 0     | 0            | 0         | 0   | 0       | 0         | 0                   | 0         | 0       | 0       | 0         | NA        | NA          | NA           | NA        | NA       | NA         | NA        | NA      | NA    | NA     | NA        | NA       | NA          | NA     | NA         | NA            | NA           | NA        | NA      | NA     | NA    | NA | NA | NA | NA |
| C3HeB/FeJ           | 0         | 0       | 0           | 0     | 0            | 0         | 0   | 0       | 0         | 0                   | 0         | 0       | 0       | 0         | 0         | NA          | NA           | NA        | NA       | NA         | NA        | NA      | NA    | NA     | NA        | NA       | NA          | NA     | NA         | NA            | NA           | NA        | NA      | NA     | NA    | NA | NA | NA | NA |
| C57BL/10J           | 0         | 0       | 0           | 0     | 0            | 0         | 0   | 0       | 0         | 0                   | 0         | 0       | 0       | 0         | 0         | 0           | 0            | 0         | 0        | 0          | 0         | 0       | 0     | 0      | 0         | 0        | 0           | 0      | 0          | 0             | 0            | 0         | 0       | 0      | 0     | 0  | 0  | 0  |    |
| C57BL/10ScN         | 0         | 0       | 0           | 0     | 0            | 0         | 0   | 0       | 0         | 0                   | 0         | 0       | 0       | 0         | 0         | 0           | 0            | 0         | 0        | 0          | 0         | 0       | 0     | 0      | 0         | 0        | 0           | 0      | 0          | 0             | 0            | 0         | 0       | 0      | 0     | 0  | 0  | 0  |    |
| C57BL/10ScSn        | 0         | 0       | 0           | 0     | 0            | 0         | 0   | 0       | 0         | 0                   | 0         | 0       | 0       | 0         | 0         | 0           | 0            | 0         | 0        | 0          | 0         | 0       | 0     | 0      | 0         | 0        | 0           | 0      | 0          | 0             | 0            | 0         | 0       | 0      | 0     | 0  | 0  | 0  |    |
| C57BL/6CR           | 0         | 0       | 0           | 0     | 0            | 0         | 0   | 0       | 0         | 0                   | 0         | 0       | 0       | 0         | 0         | 0           | 0            | 0         | 0        | 0          | 0         | 0       | 0     | 0      | 0         | 0        | 0           | 0      | 0          | 0             | 0            | 0         | 0       | 0      | 0     | 0  | 0  | 0  |    |
| C57BL/6J            | 0         | 0       | 0           | 0     | 0            | 0         | 0   | 0       | 0         | 0                   | 0         | 0       | 0       | 0         | 0         | 0           | 0            | 0         | 0        | 0          | 0         | 0       | 0     | 0      | 0         | 0        | 0           | 0      | 0          | 0             | 0            | 0         | 0       | 0      | 0     | 0  | 0  | 0  |    |
| C57BL/6NC1          | 0         | 0       | 0           | 0     | 0            | 0         | 0   | 0       | 0         | 0                   | 0         | 0       | 0       | 0         | 0         | 0           | 0            | 0         | 0        | 0          | 0         | 0       | 0     | 0      | 0         | 0        | 0           | 0      | 0          | 0             | 0            | 0         | 0       | 0      | 0     | 0  | 0  | 0  |    |
| C57BL/6Tc           | 0         | 0       | 0           | 0     | 0            | 0         | 0   | 0       | 0         | 0                   | 0         | 0       | 0       | 0         | 0         | 0           | 0            | 0         | 0        | 0          | 0         | 0       | 0     | 0      | 0         | 0        | 0           | 0      | 0          | 0             | 0            | 0         | 0       | 0      | 0     | 0  | 0  | 0  |    |
| CBA/CaJ             | 0         | 0       | 0           | 0     | 0            | 0         | 0   | 0       | 0         | 0                   | 0         | 0       | 0       | 0         | 0         | 0           | 0            | 0         | 0        | 0          | 0         | 0       | 0     | 0      | 0         | 0        | 0           | 0      | 0          | 0             | 0            | 0         | 0       | 0      | 0     | 0  | 0  | 0  |    |
| CBA/J               | 0         | 0       | 0           | 0     | 0            | 0         | 0   | 0       | 0         | 0                   | 0         | 0       | 0       | 0         | 0         | 0           | 0            | 0         | 0        | 0          | 0         | 0       | 0     | 0      | 0         | 0        | 0           | 0      | 0          | 0             | 0            | 0         | 0       | 0      | 0     | 0  | 0  | 0  |    |
| DBA/1J              | 0         | 0       | 0           | 0     | 0            | 0         | 0   | 0       | 0         | 0                   | 0         | 0       | 0       | 0         | 0         | 0           | 0            | 0         | 0        | 0          | 0         | 0       | 0     | 0      | 0         | 0        | 0           | 0      | 0          | 0             | 0            | 0         | 0       | 0      | 0     | 0  | 0  | 0  |    |
| DBA/1LacJ           | 0         | 0       | 0           | 0     | 0            | 0         | 0   | 0       | 0         | 0                   | 0         | 0       | 0       | 0         | 0         | 0           | 0            | 0         | 0        | 0          | 0         | 0       | 0     | 0      | 0         | 0        | 0           | 0      | 0          | 0             | 0            | 0         | 0       | 0      | 0     | 0  | 0  | 0  |    |
| DBA/2DeJ            | 0         | 0       | 0           | 0     | 0            | 0         | 0   | 0       | 0         | 0                   | 0         | 0       | 0       | 0         | 0         | 0           | 0            | 0         | 0        | 0          | 0         | 0       | 0     | 0      | 0         | 0        | 0           | 0      | 0          | 0             | 0            | 0         | 0       | 0      | 0     | 0  | 0  | 0  |    |
| DBA/2Ha5mnJ         | 0         | 0       | 0           | 0     | 0            | 0         | 0   | 0       | 0         | 0                   | 0         | 0       | 0       | 0         | 0         | 0           | 0            | 0         | 0        | 0          | 0         | 0       | 0     | 0      | 0         | 0        | 0           | 0      | 0          | 0             | 0            | 0         | 0       | 0      | 0     | 0  | 0  | 0  |    |
| DBA/2J              | 0         | 0       | 0           | 0     | 0            | 0         | 0   | 0       | 0         | 0                   | 0         | 0       | 0       | 0         | 0         | 0           | 0            | 0         | 0        | 0          | 0         | 0       | 0     | 0      | 0         | 0        | 0           | 0      | 0          | 0             | 0            | 0         | 0       | 0      | 0     | 0  | 0  | 0  |    |
| NON/ShiLtJ          | 0         | 0       | 0           | 0     | 0            | 0         | 0   | 0       | 0         | 0                   | 0         | 0       | 0       | 0         | 0         | 0           | 0            | 0         | 0        | 0          | 0         | 0       | 0     | 0      | 0         | 0        | 0           | 0      | 0          | 0             | 0            | 0         | 0       | 0      | 0     | 0  | 0  | 0  |    |
| NONchZO10/LtJ       | 0         | 0       | 0           | 0     | 0            | 0         | 0   | 0       | 0         | 0                   | 0         | 0       | 0       | 0         | 0         | 0           | 0            | 0         | 0        | 0          | 0         | 0       | 0     | 0      | 0         | 0        | 0           | 0      | 0          | 0             | 0            | 0         | 0       | 0      | 0     | 0  | 0  | 0  |    |
| NONchZO5/LtJ        | 0         | 0       | 0           | 0     | 0            | 0         | 0   | 0       | 0         | 0                   | 0         | 0       | 0       | 0         | 0         | 0           | 0            | 0         | 0        | 0          | 0         | 0       | 0     | 0      | 0         | 0        | 0           | 0      | 0          | 0             | 0            | 0         | 0       | 0      | 0     | 0  | 0  | 0  |    |
| SEC1GnLeJ           | 0         | 0       | 0           | 0     | 0            | 0         | 0   | 0       | 0         | 0                   | 0         | 0       | 0       | 0         | 0         | 0           | 0            | 0         | 0        | 0          | 0         | 0       | 0     | 0      | 0         | 0        | 0           | 0      | 0          | 0             | 0            | 0         | 0       | 0      | 0     | 0  | 0  |    |    |
| SEC1ReJ             | 0         | 0       | 0           | 0     | 0            | 0         | 0   | 0       | 0         | 0                   | 0         | 0       | 0       | 0         | 0         | 0           | 0            | 0         | 0        | 0          | 0         | 0       | 0     | 0      | 0         | 0        | 0           | 0      | 0          | 0             | 0            | 0         | 0       | 0      | 0     | 0  | 0  |    |    |
| SJL/Bm              | 0         | 0       | 0           | 0     | 0            | 0         | 0   | 0       | 0         | 0                   | 0         | 0       | 0       | 0         | 0         | 0           | 0            | 0         | 0        | 0          | 0         | 0       | 0     | 0      | 0         | 0        | 0           | 0      | 0          | 0             | 0            | 0         | 0       | 0      | 0     | 0  | 0  |    |    |
| SJL/J               | 0         | 0       | 0           | 0     | 0            | 0         | 0   | 0       | 0         | 0                   | 0         | 0       | 0       | 0         | 0         | 0           | 0            | 0         | 0        | 0          | 0         | 0       | 0     | 0      | 0         | 0        | 0           | 0      | 0          | 0             | 0            | 0         | 0       | 0      | 0     | 0  | 0  |    |    |

0 Identity  
1 Sister strains by drift  
2 Sisters strains by residual het  
3 Sisters strains by contamination  
NA Not applicable

**Supplementary Figure 6.** A) Genotype identity between wild-derived and classical inbred strains. For each wild-derived strain we determined the maximum genotype identity to any of our 100 classical inbred strains in 1Mb intervals. Colored bars in the histograms denote the subspecific origin of the interval in the wild-derived strain, green *M. m. castaneus*, red *M. m. musculus* and blue *M. m. domesticus*. B) Pairwise comparison of genotype identity between wild-derived strains. Genotype identity was calculated on 1Mb intervals. Blue histograms denote comparisons between pairs of wild-derived strains from *M. m. domesticus* origin. Red histograms denote comparisons between pairs of wild-derived strains from *M. m. musculus* origin. Green histograms denote comparisons between pairs of wild-derived strains from *M. m. castaneus* origin. Purple histograms denote comparisons between pairs of wild-derived strains from *M. m. molossinus* origin. Finally, black histograms denote comparisons between selected pairs of wild-derived strains from different subspecific origin.



**A**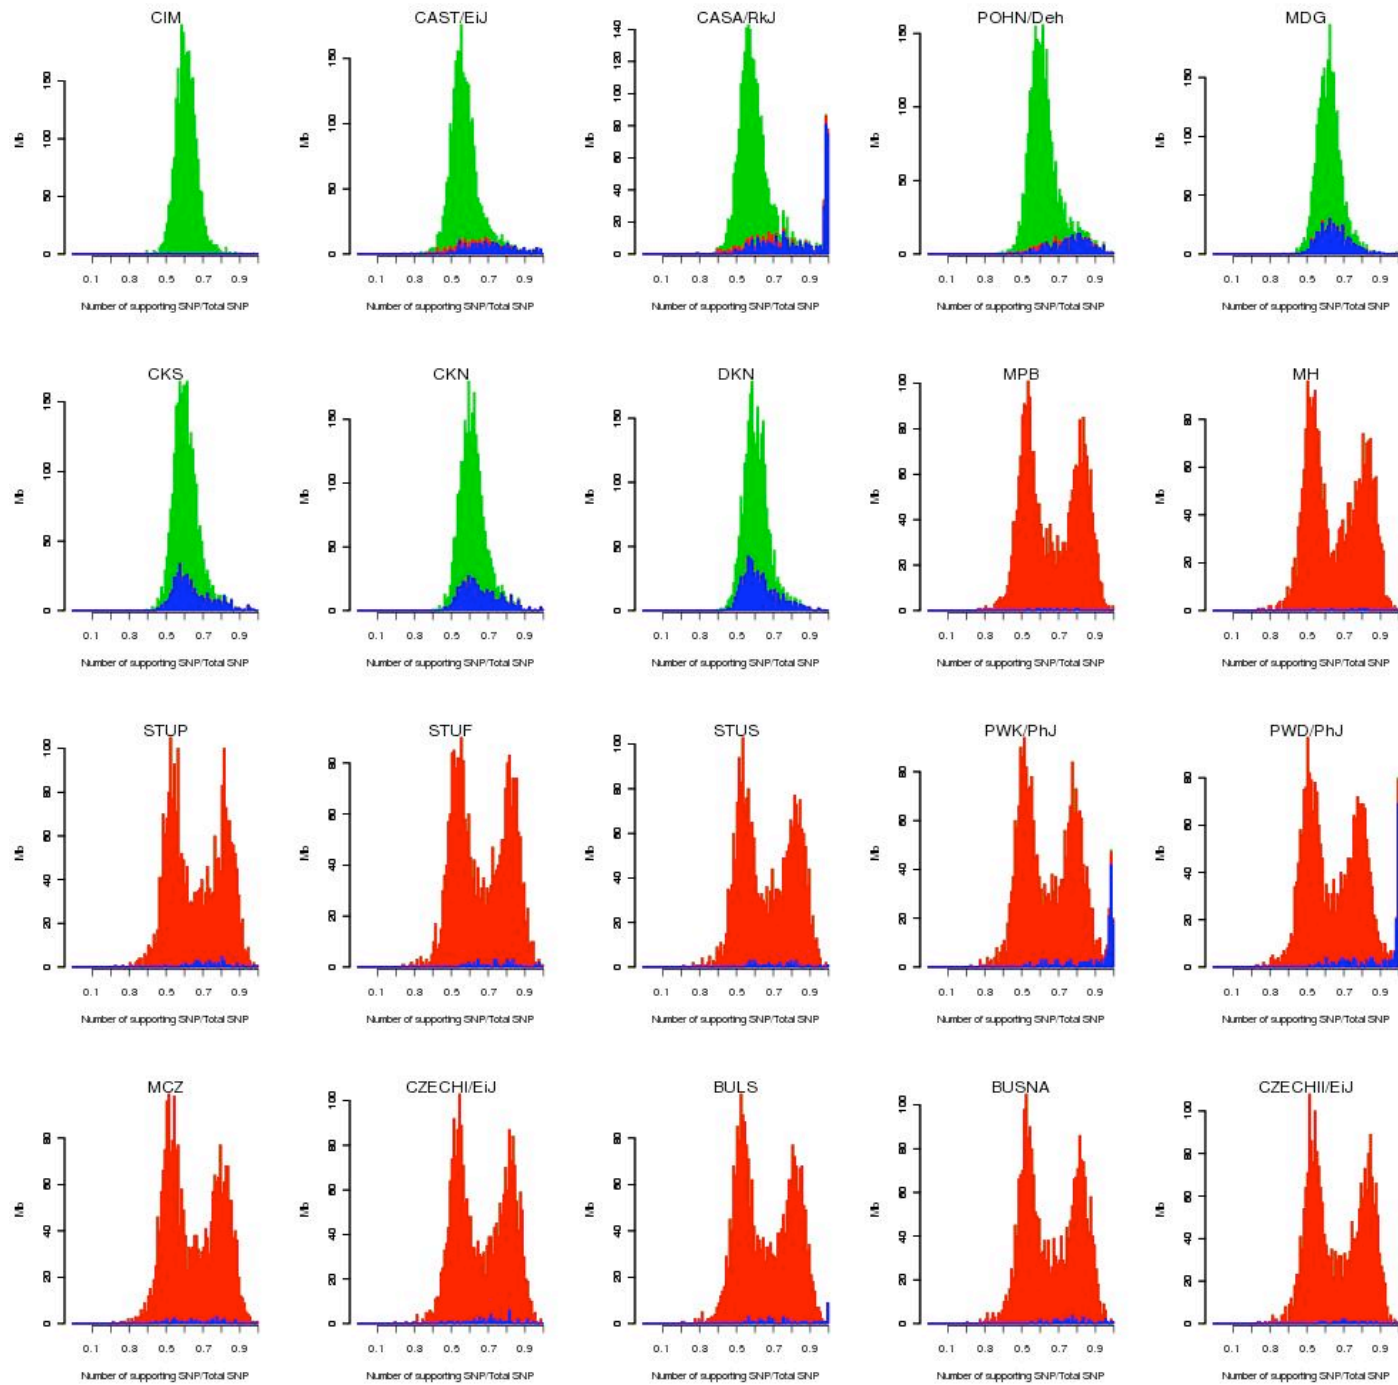

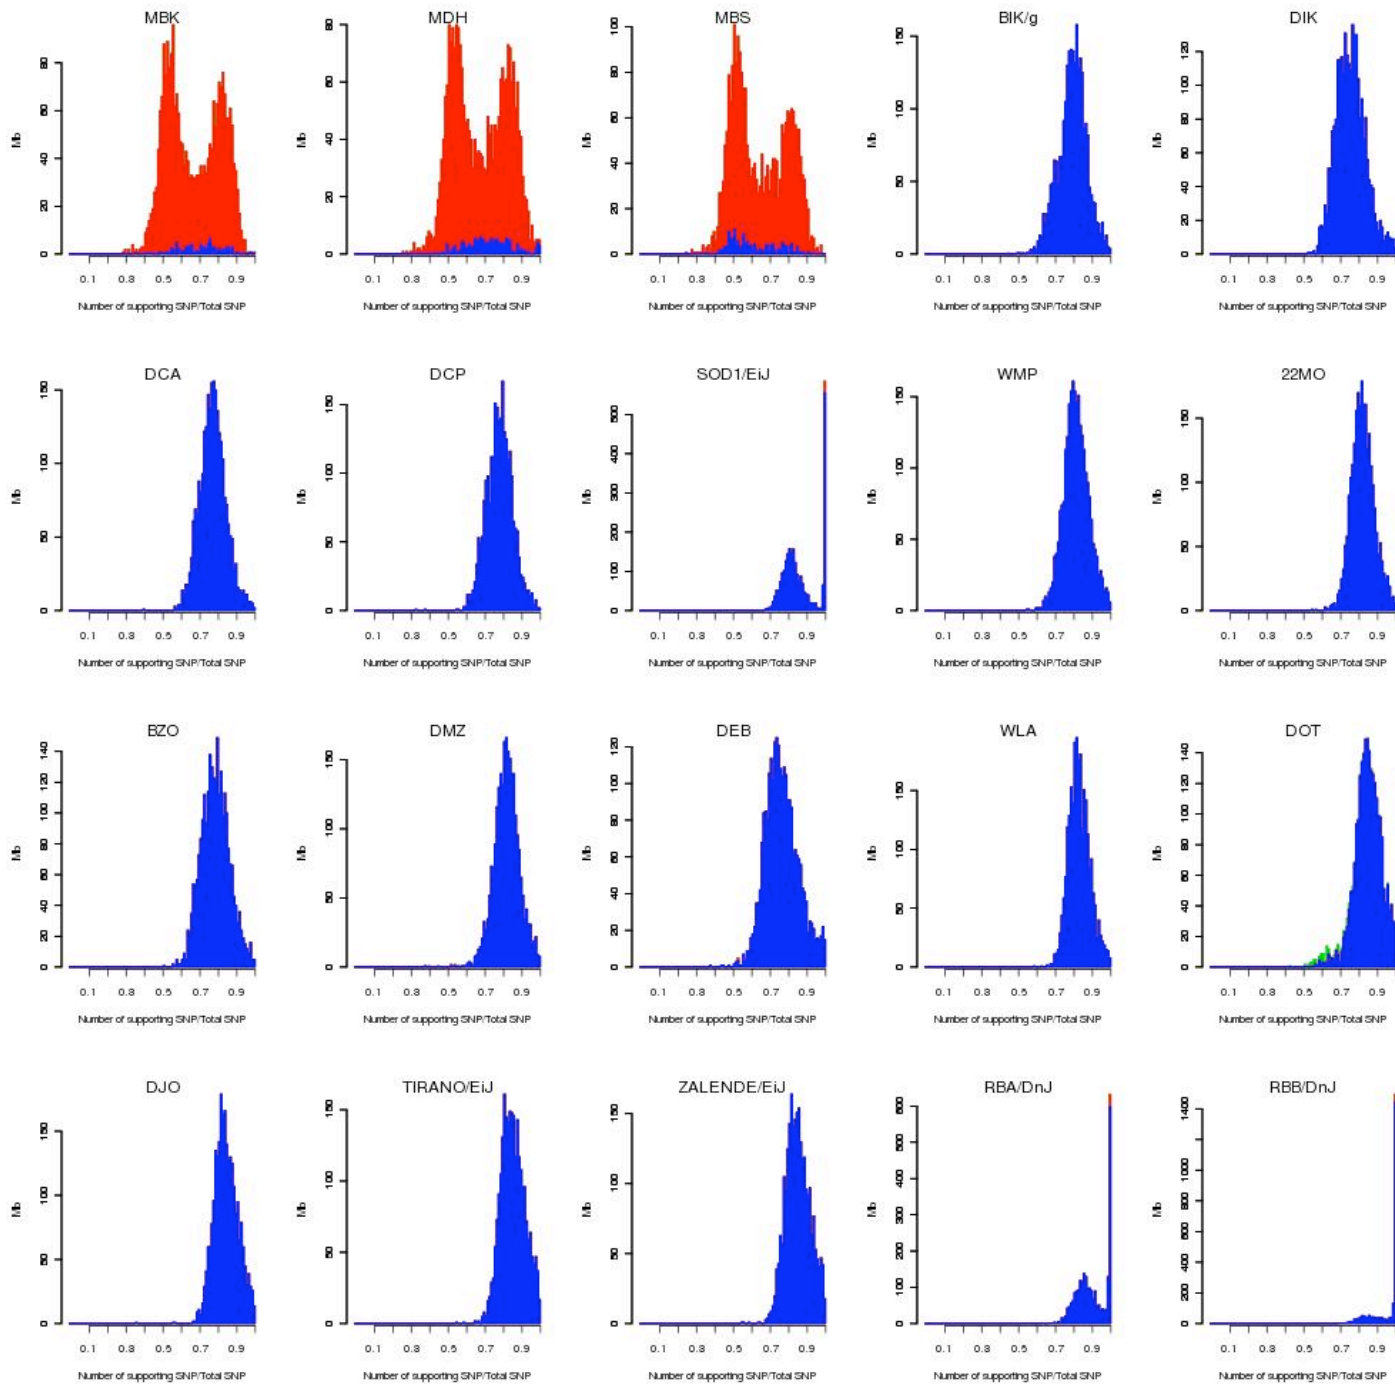

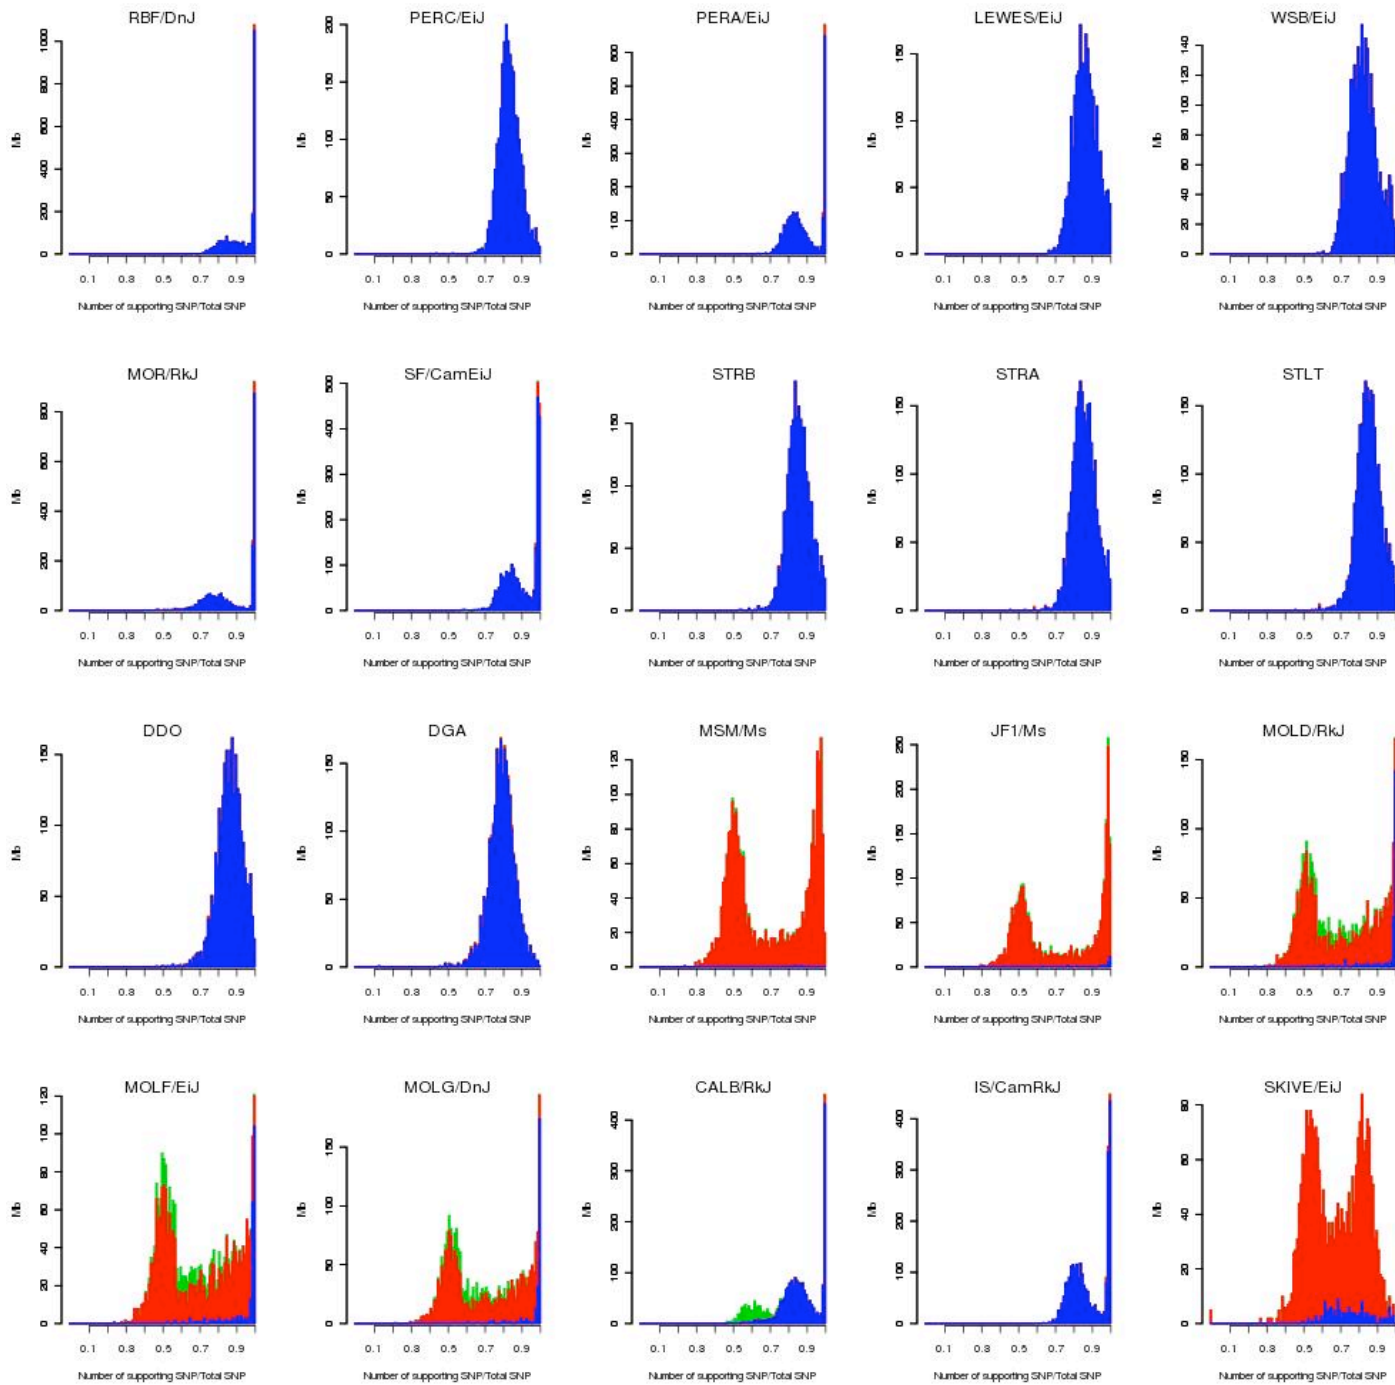

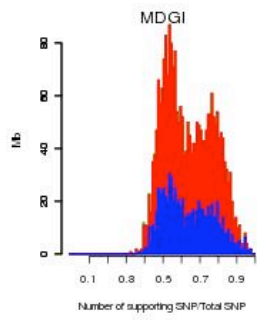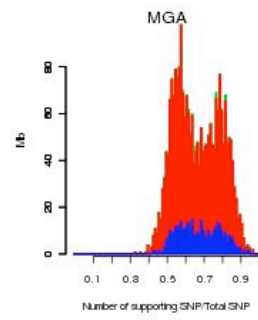

**B**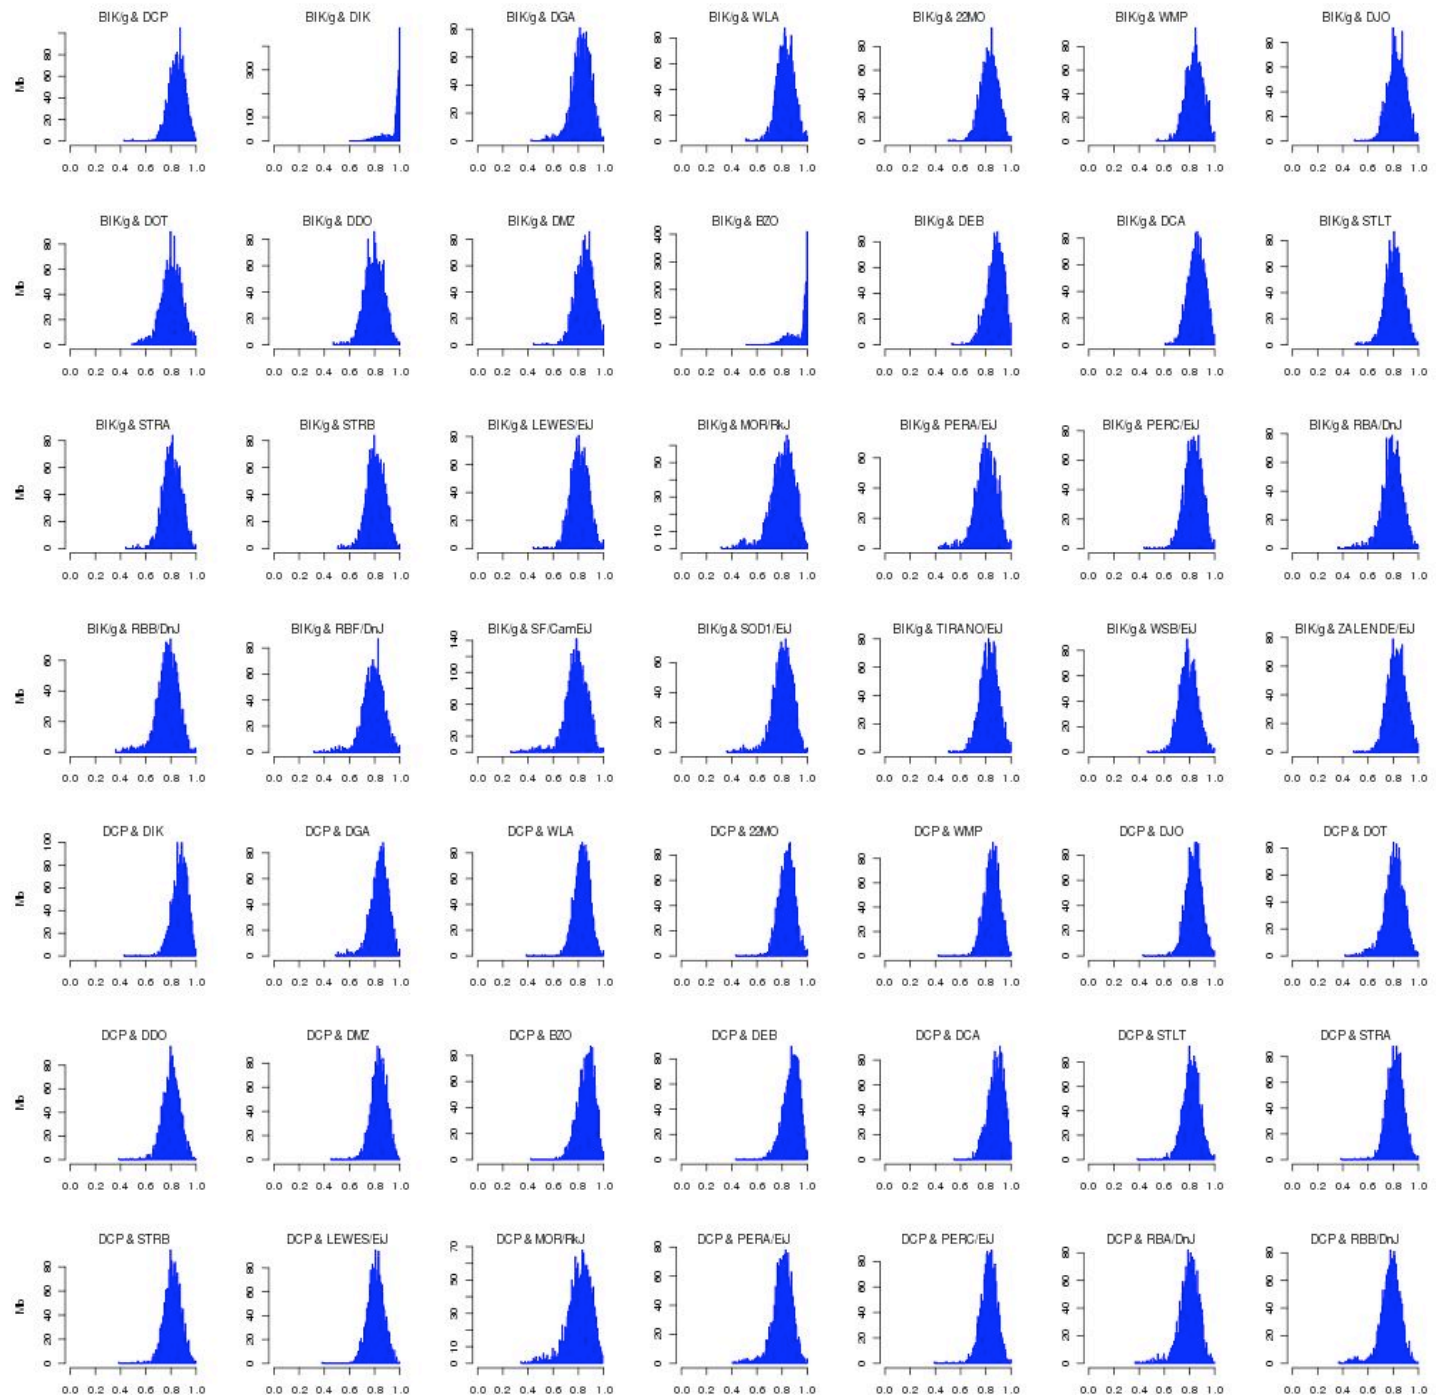



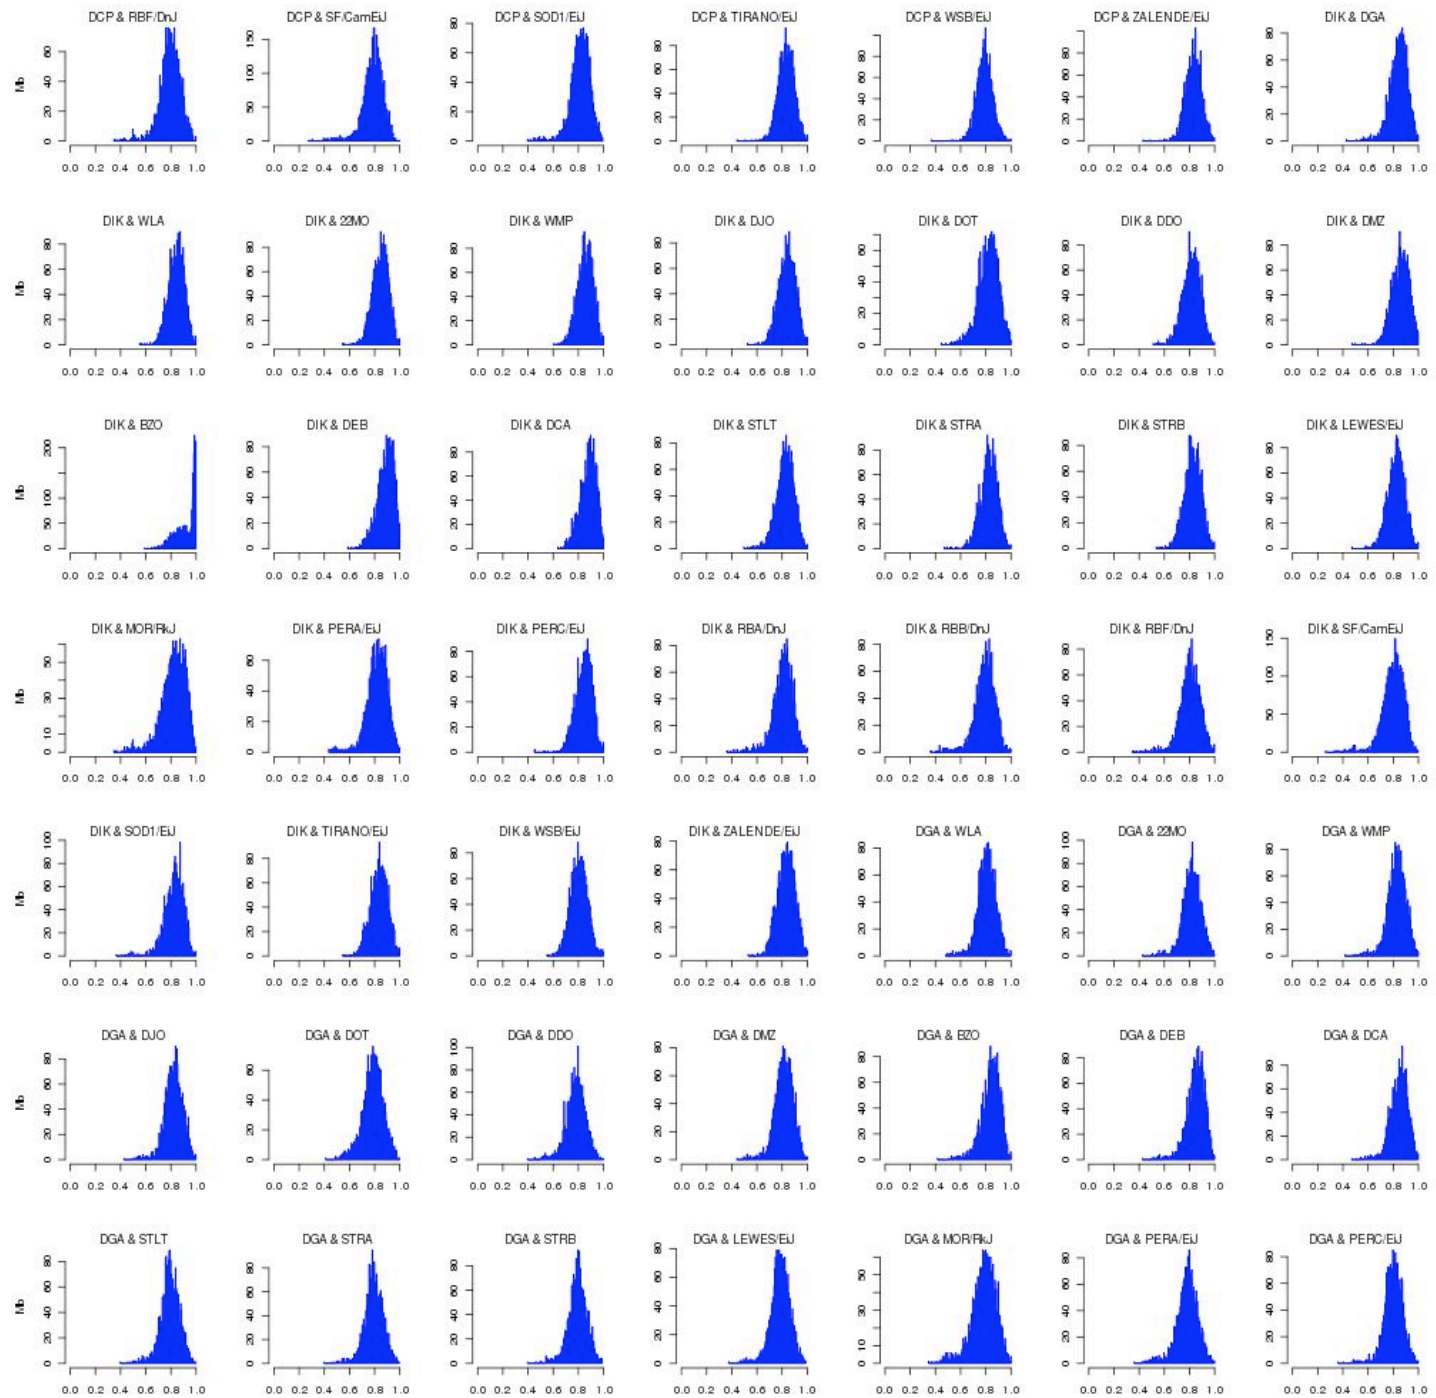

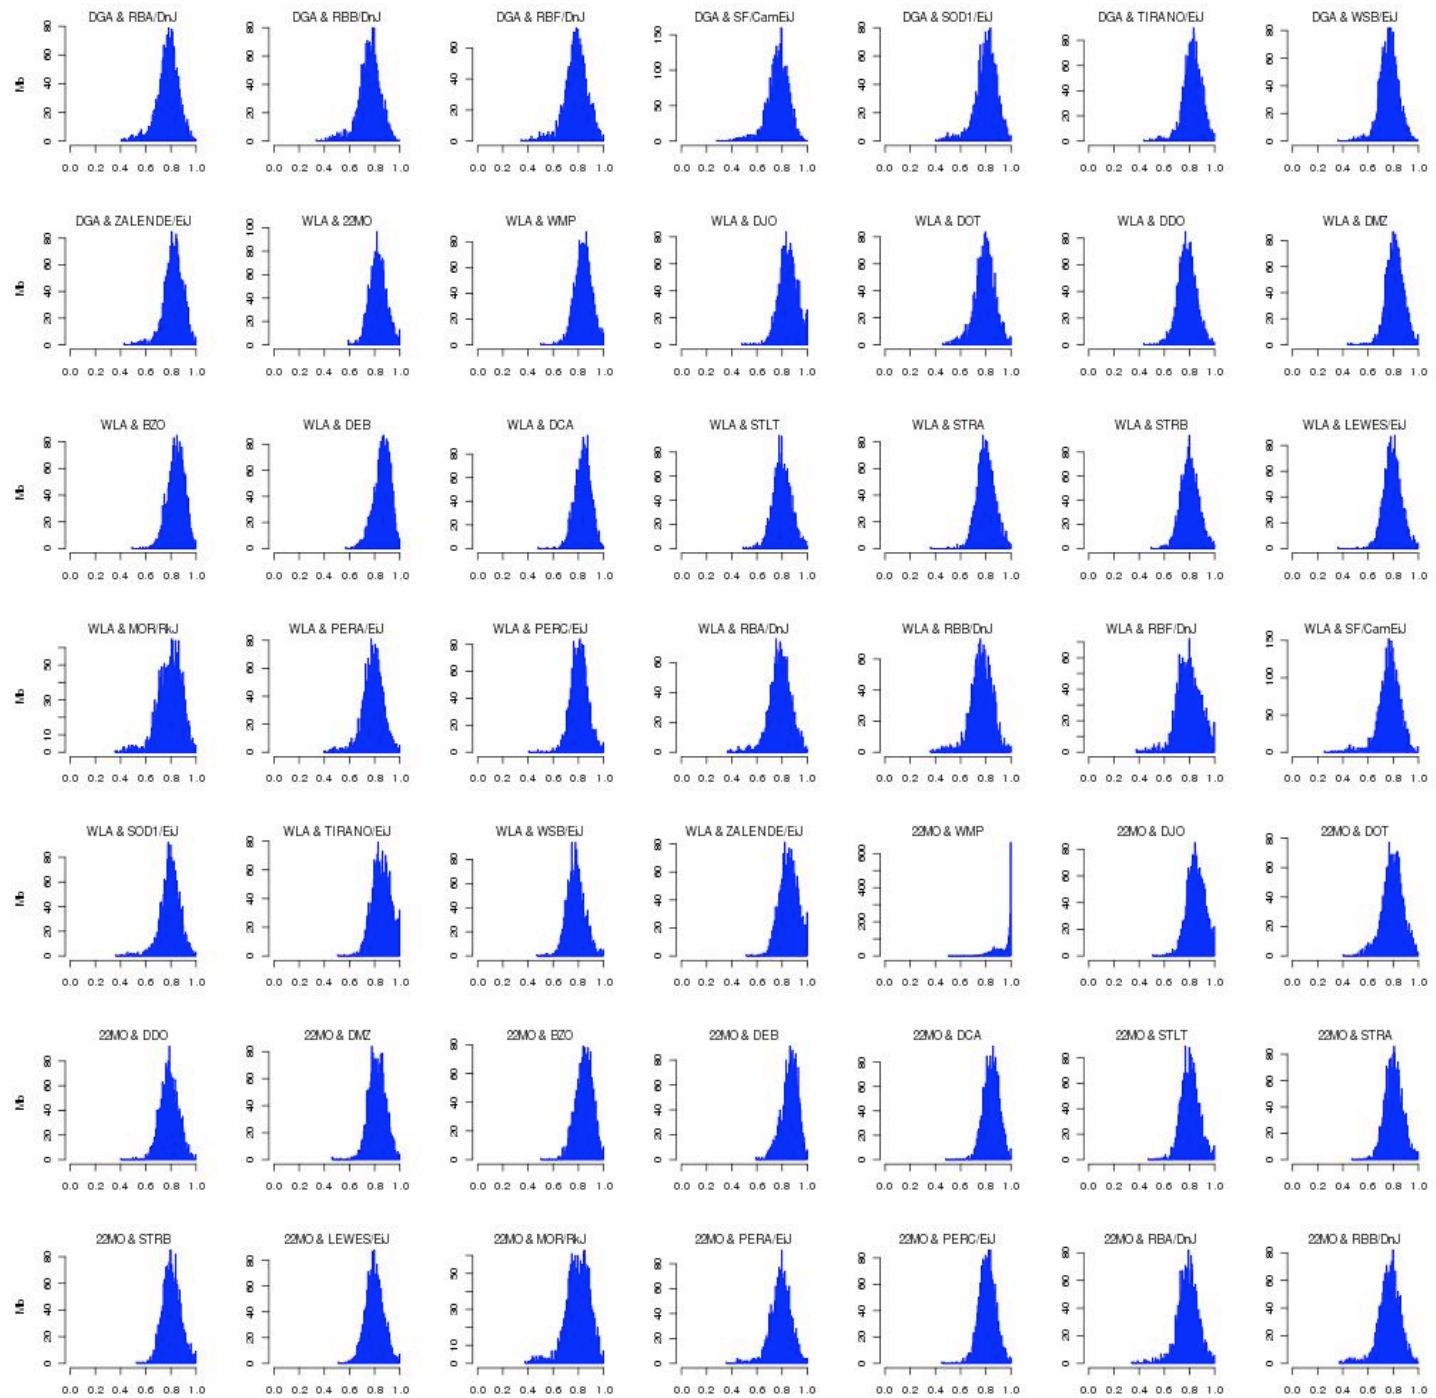

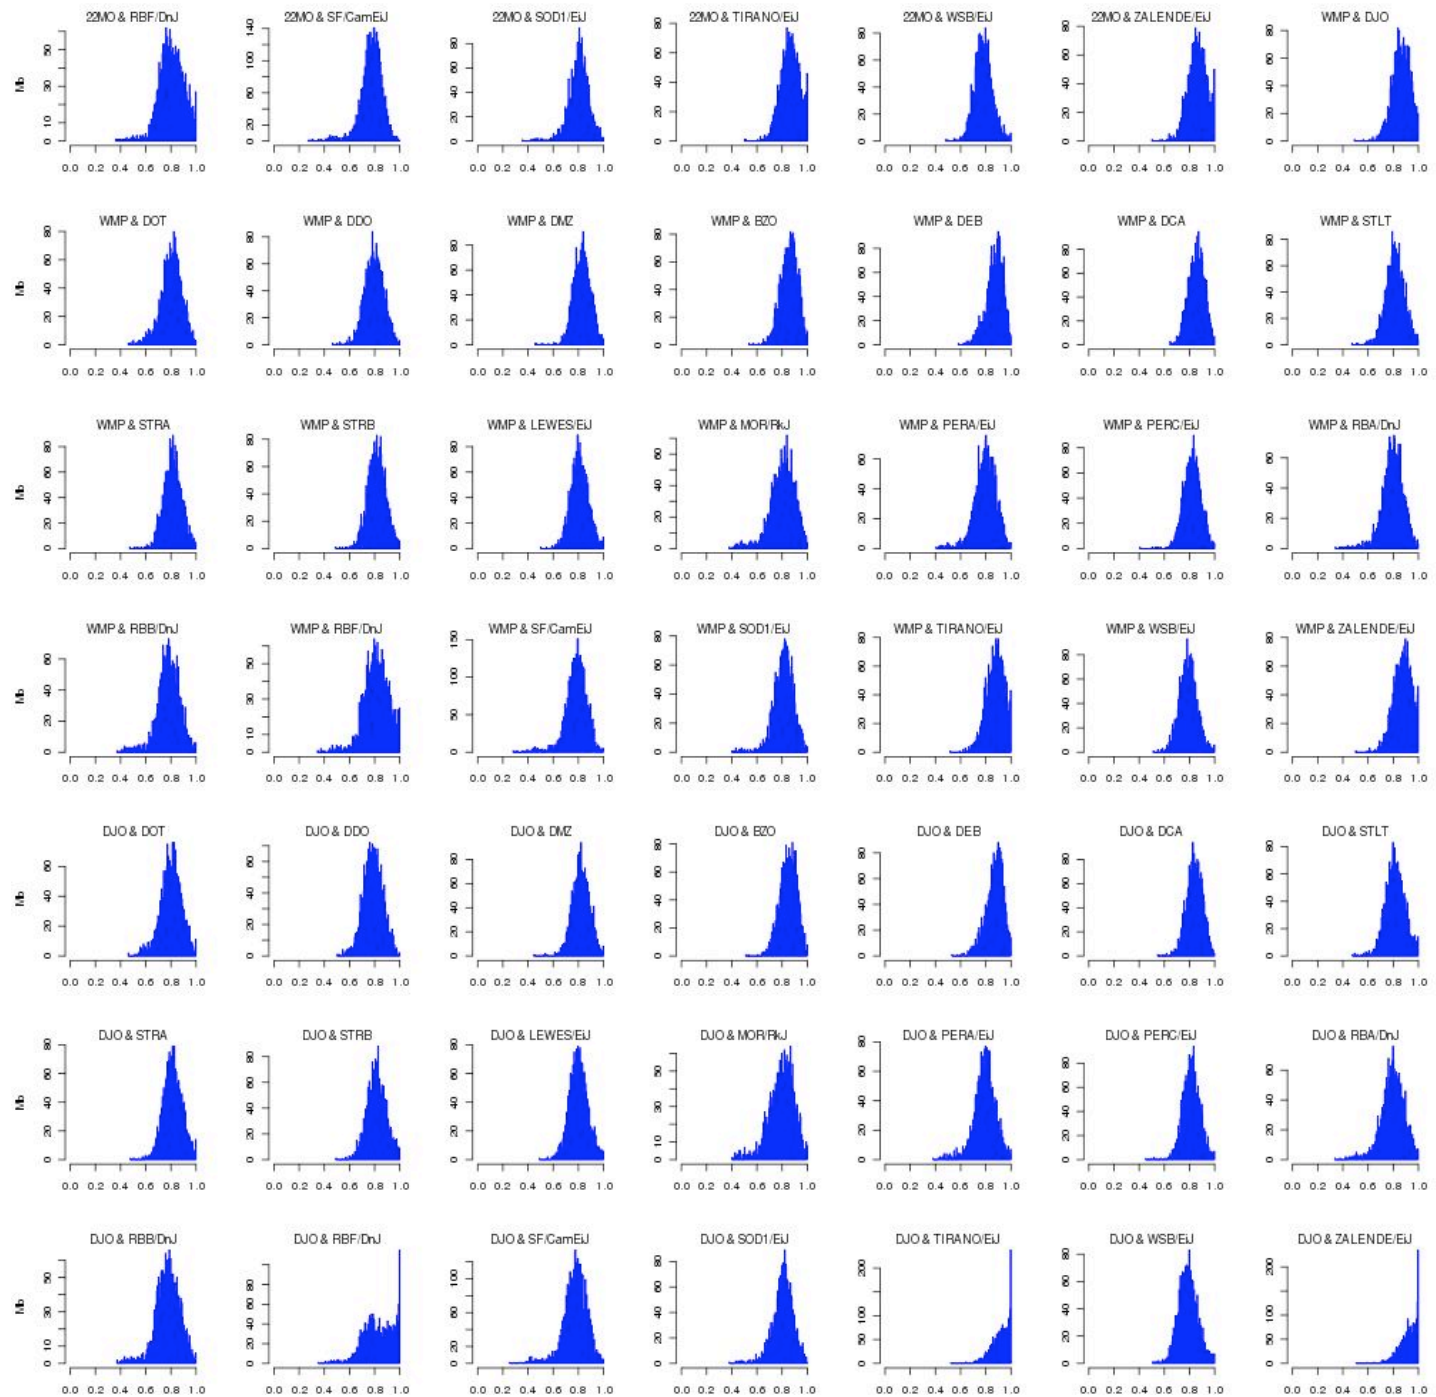



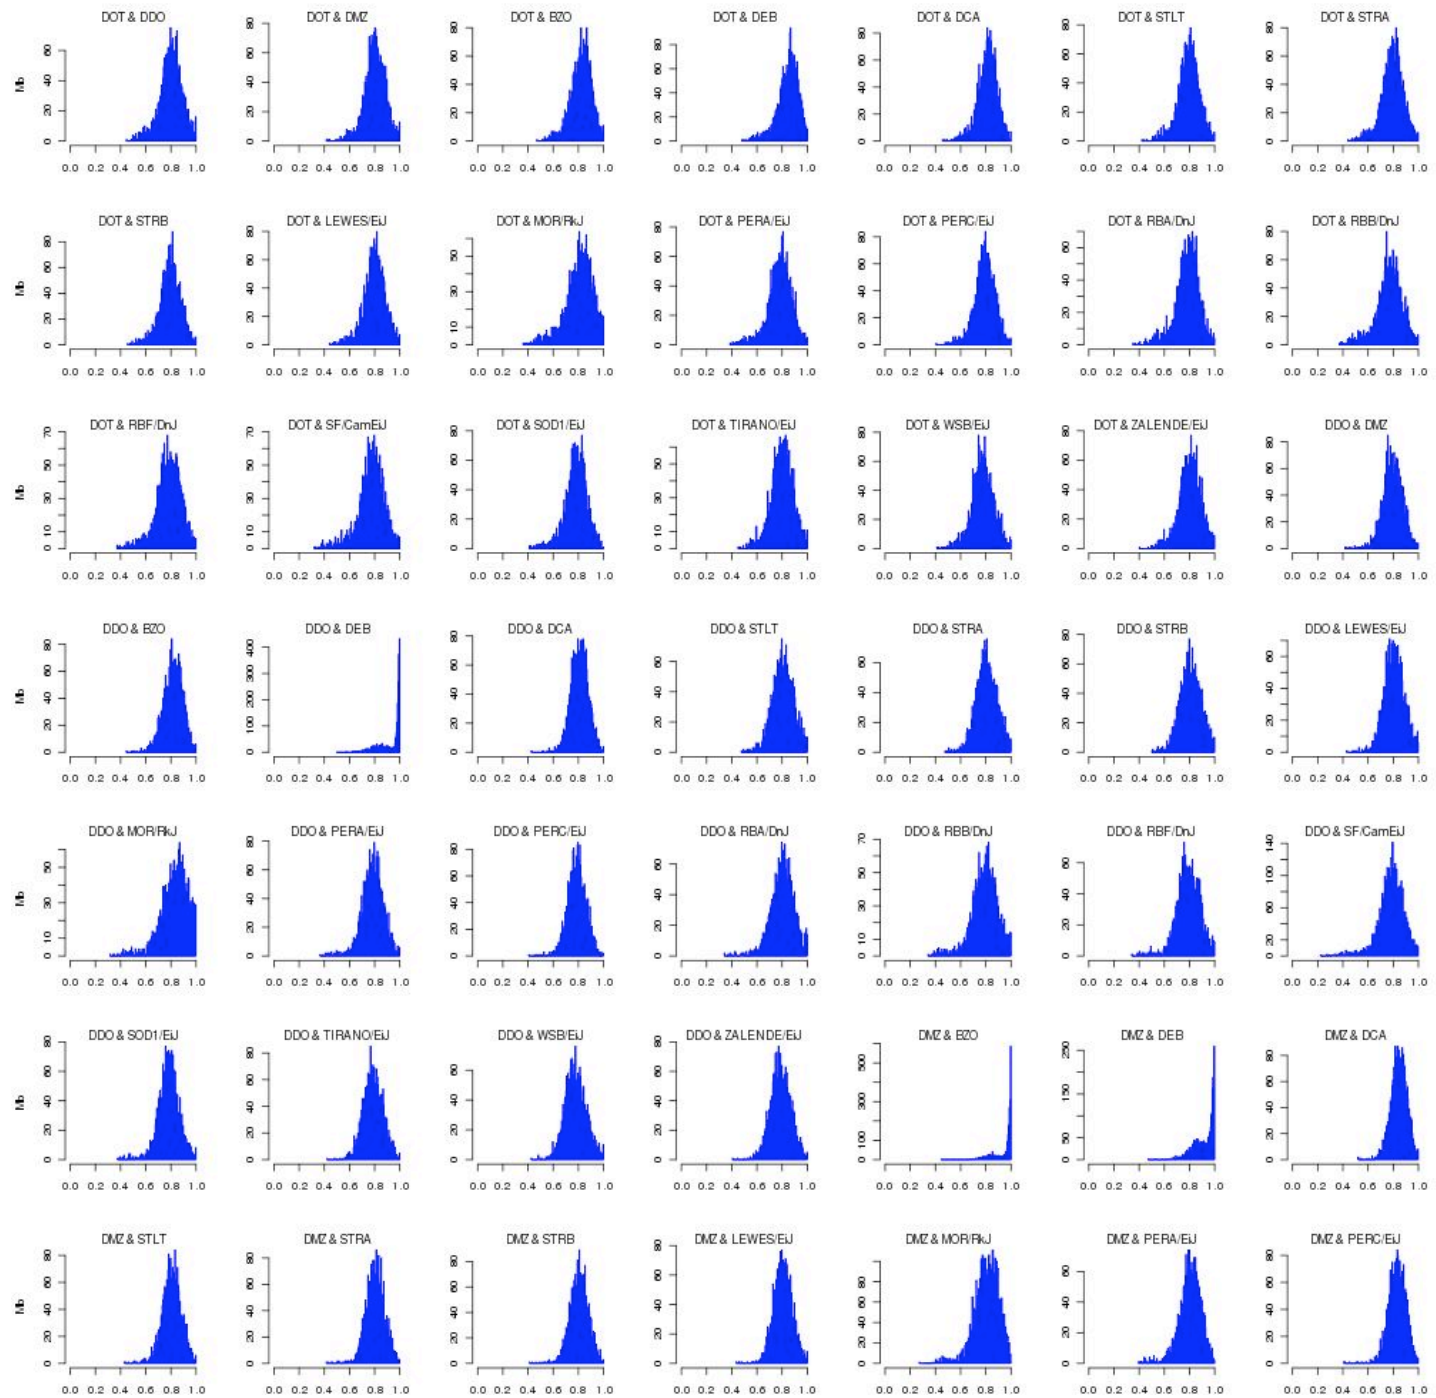

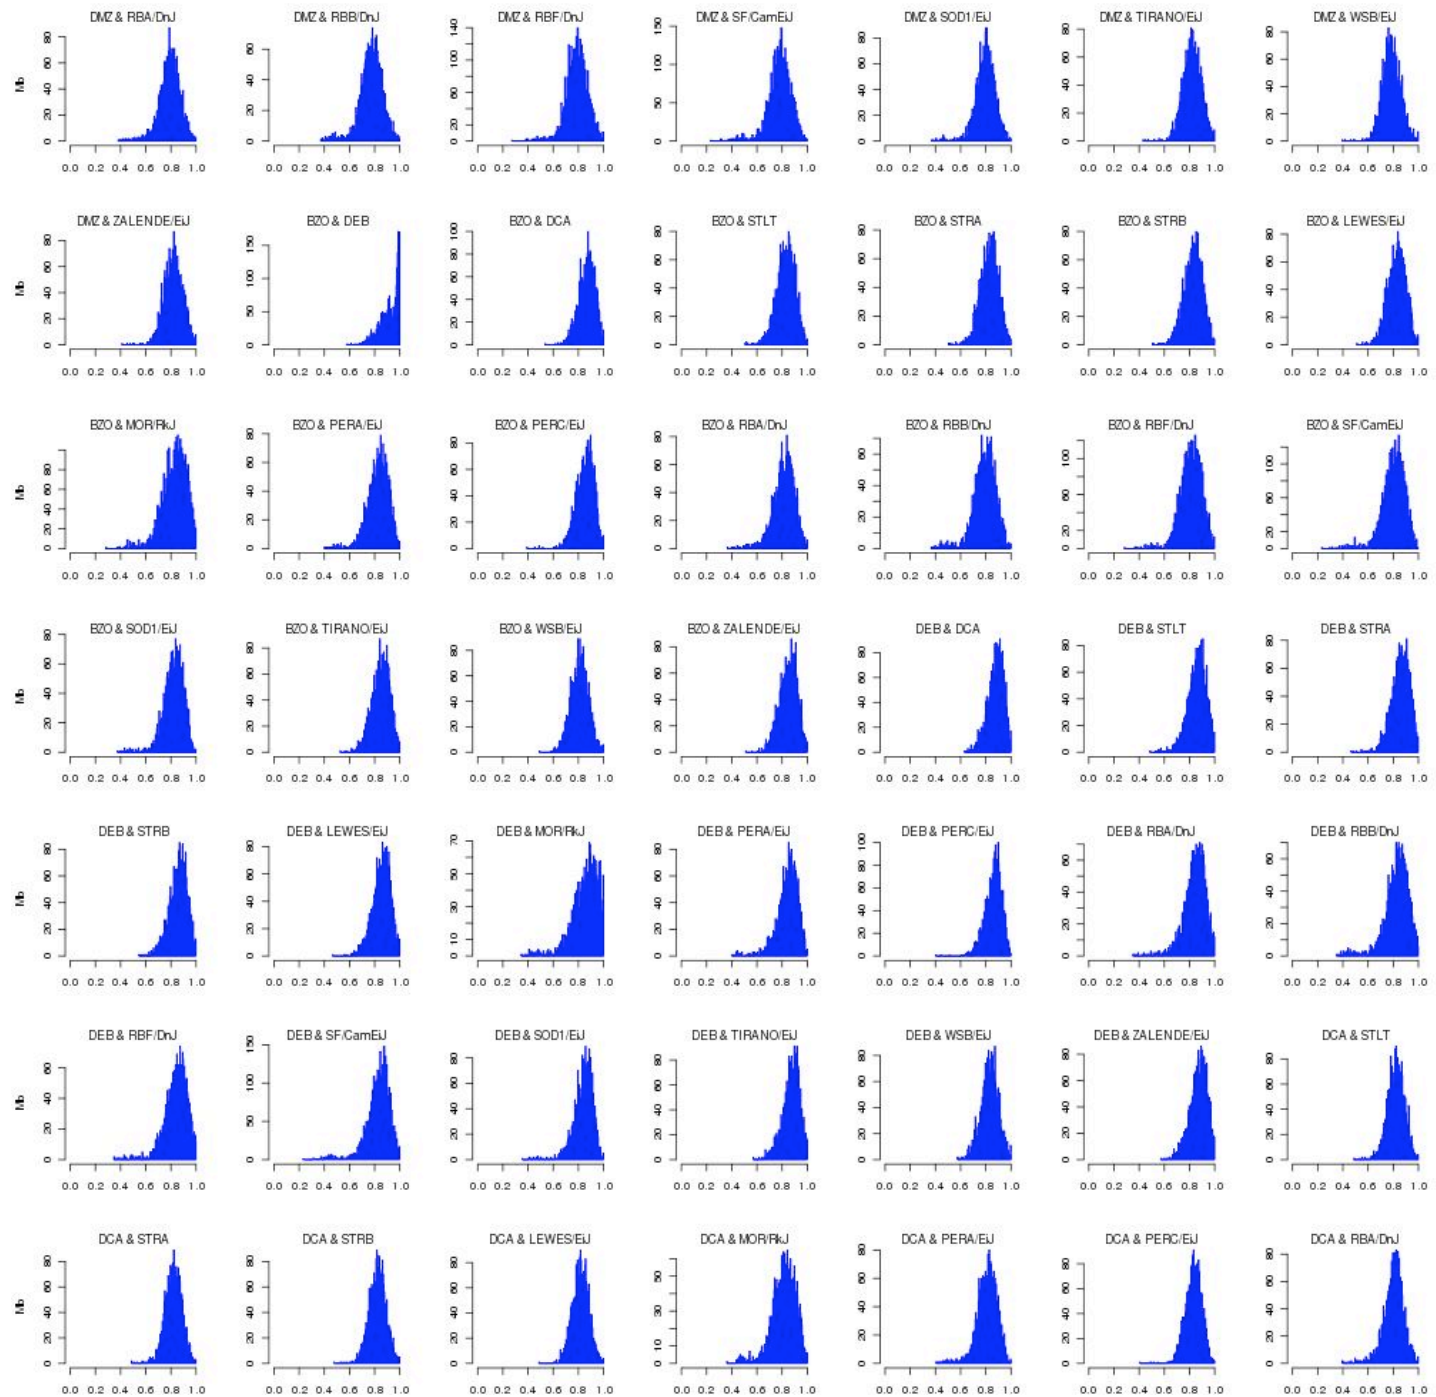

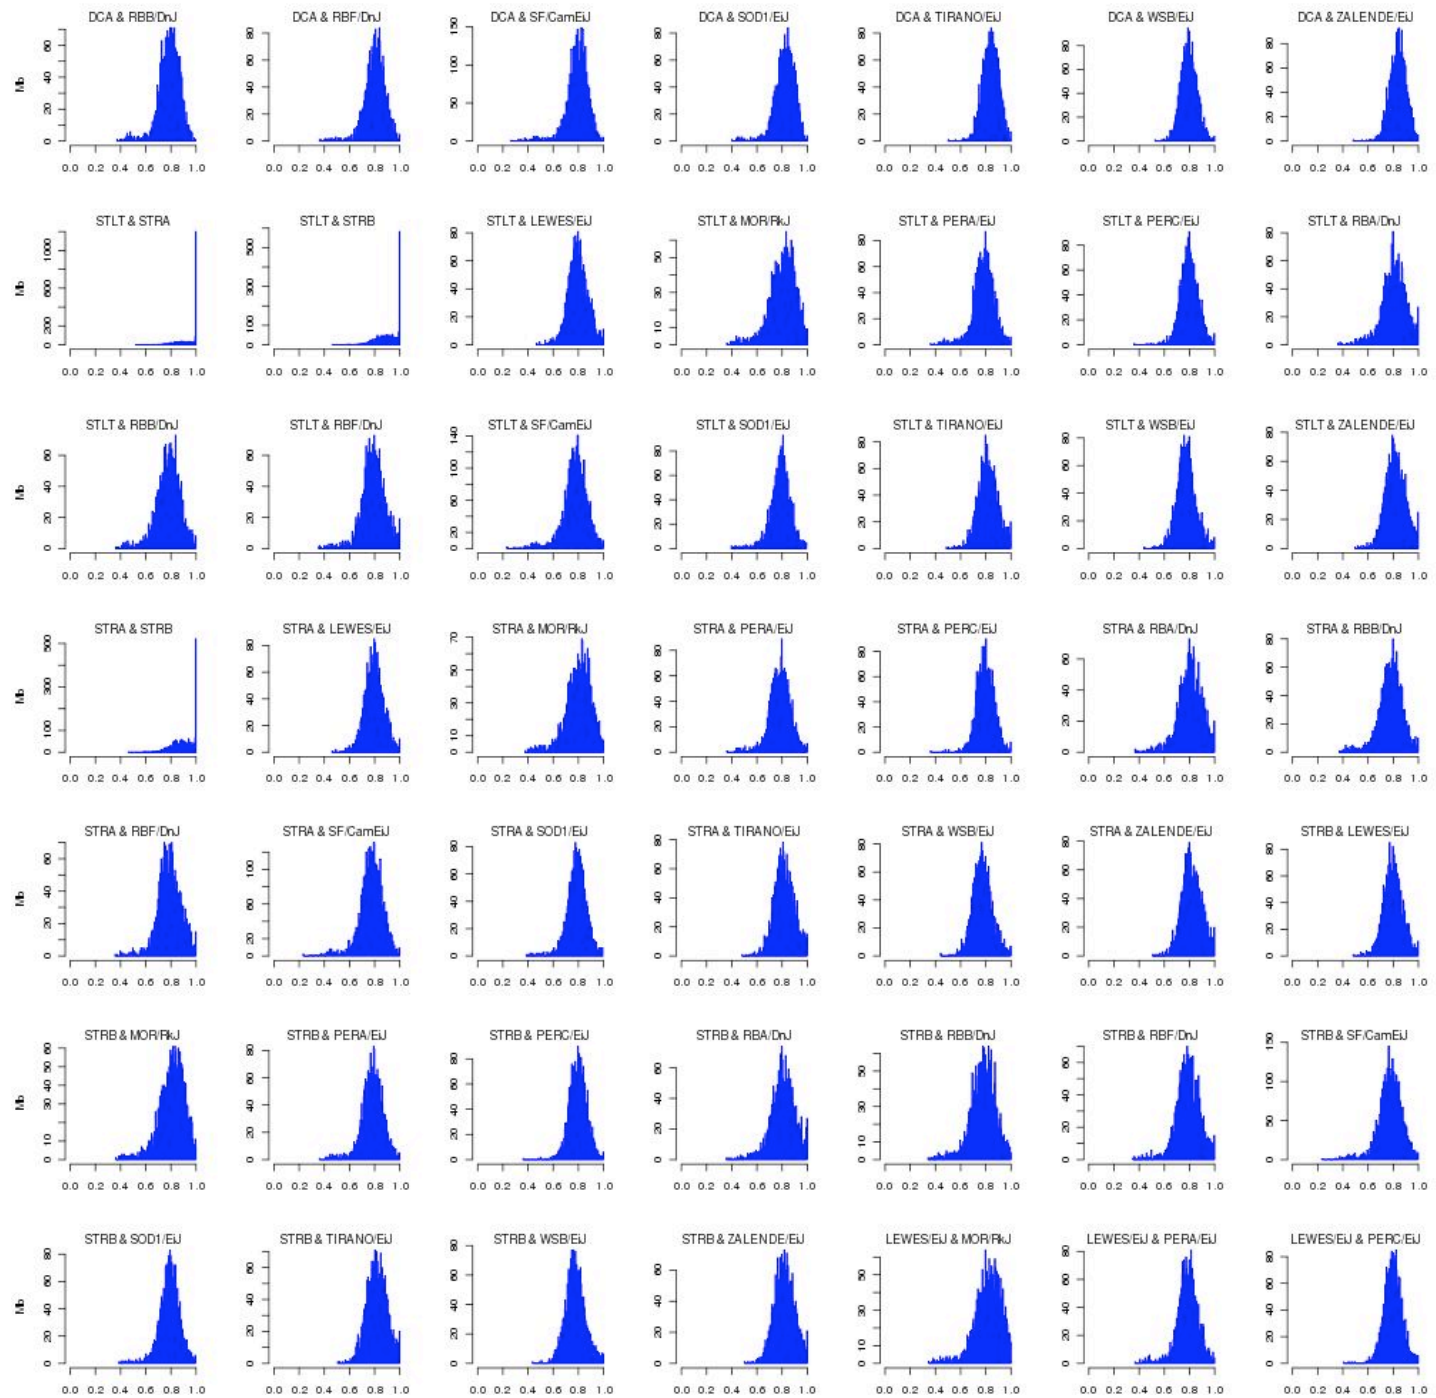



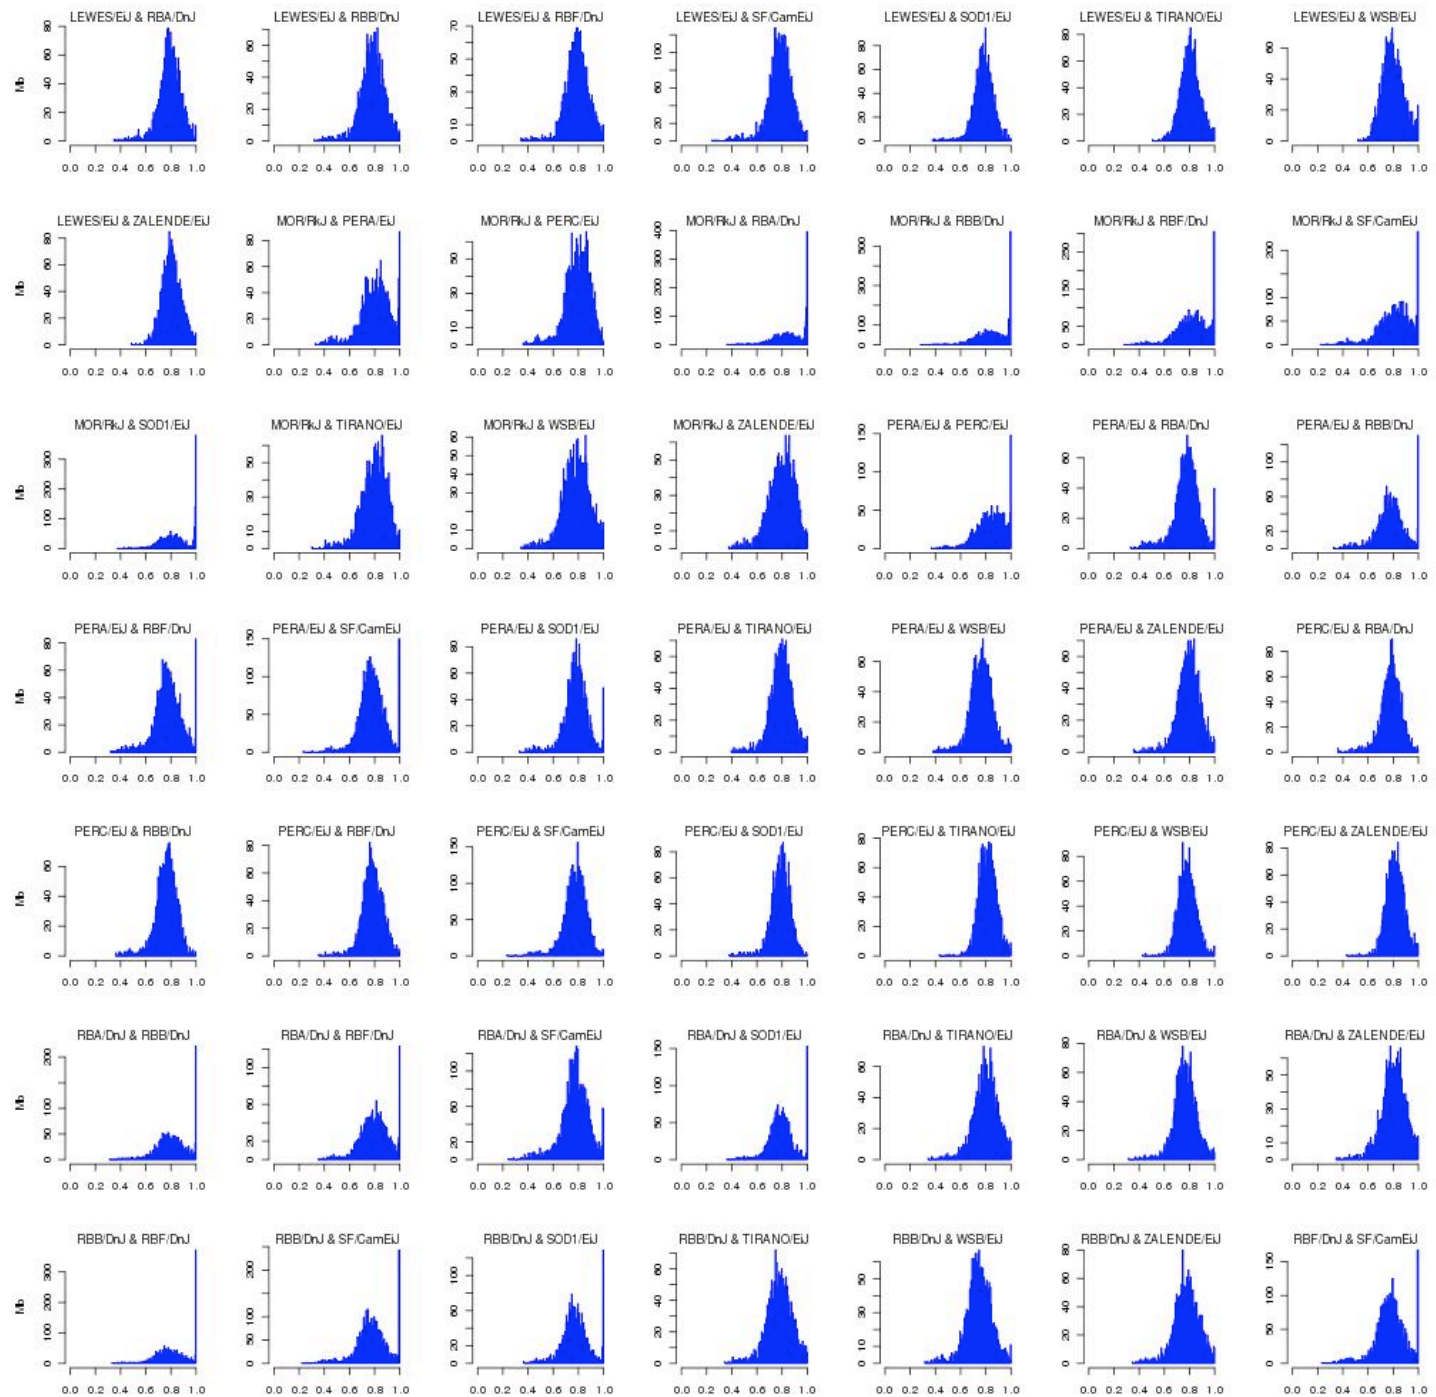

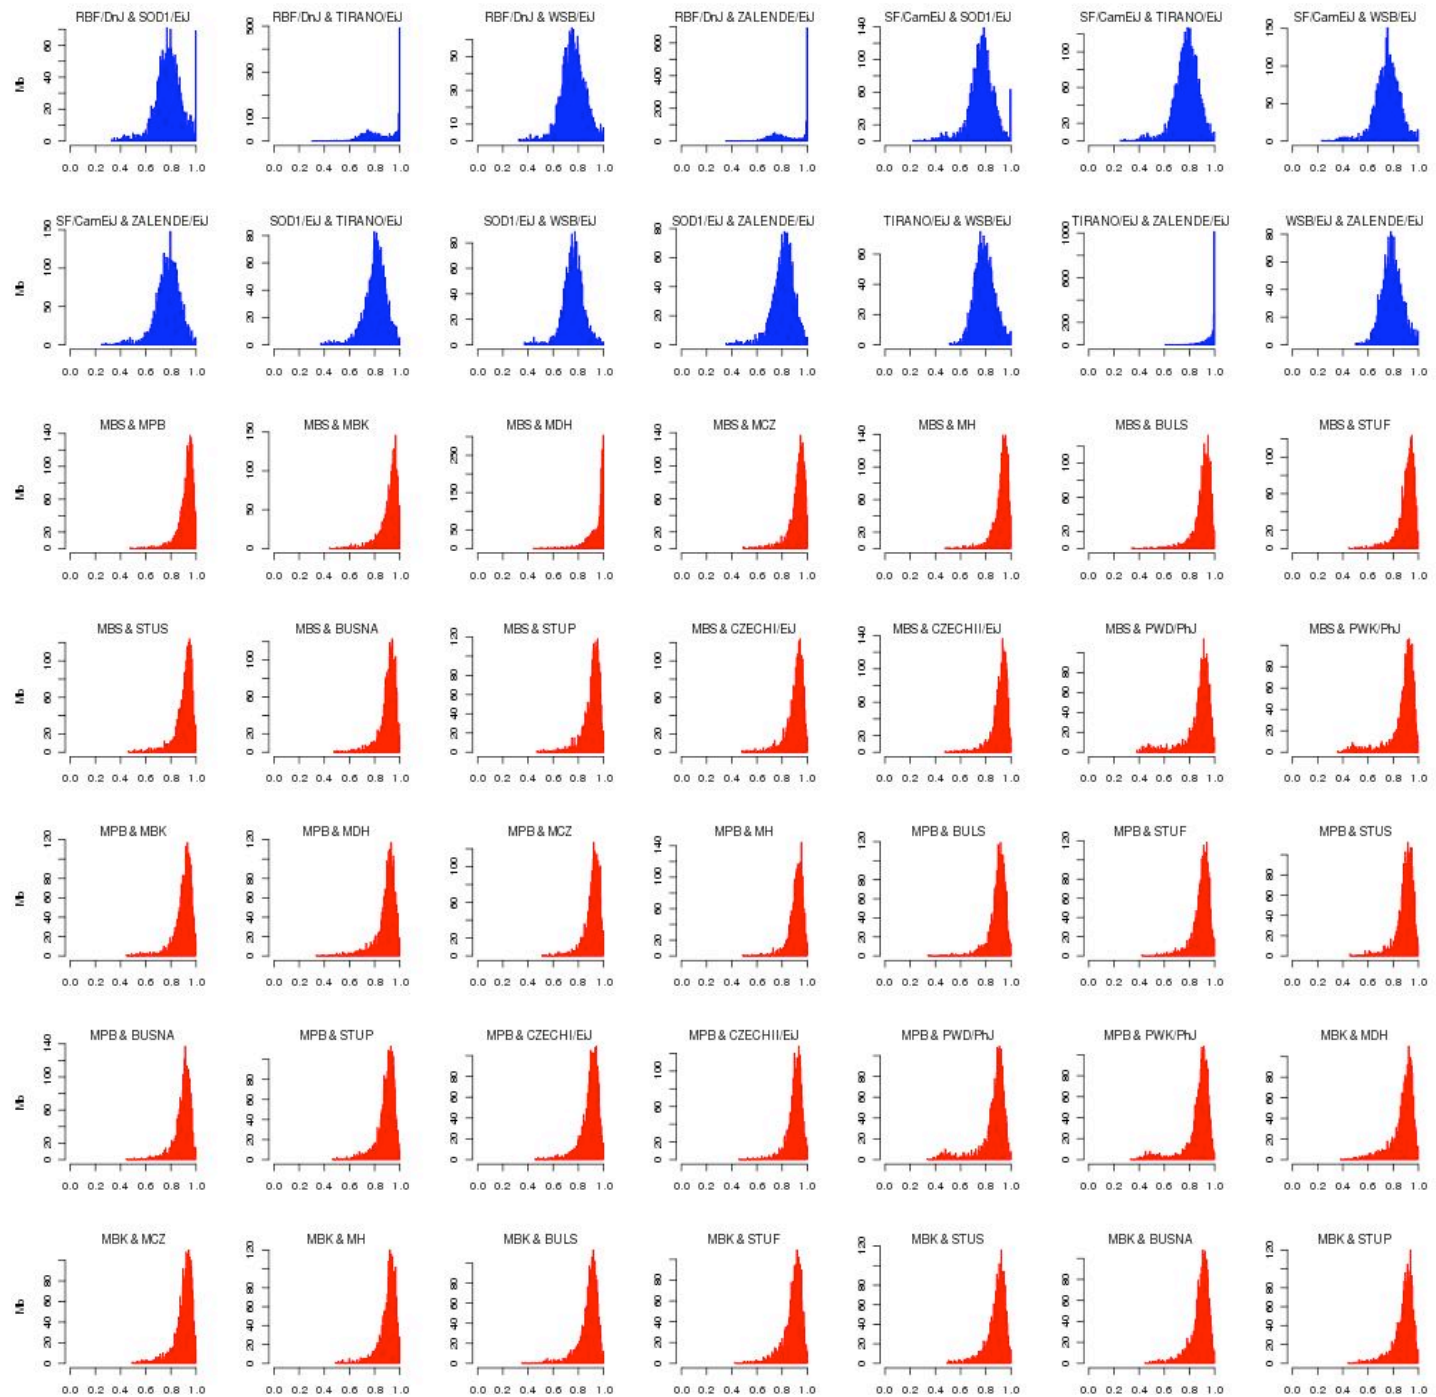

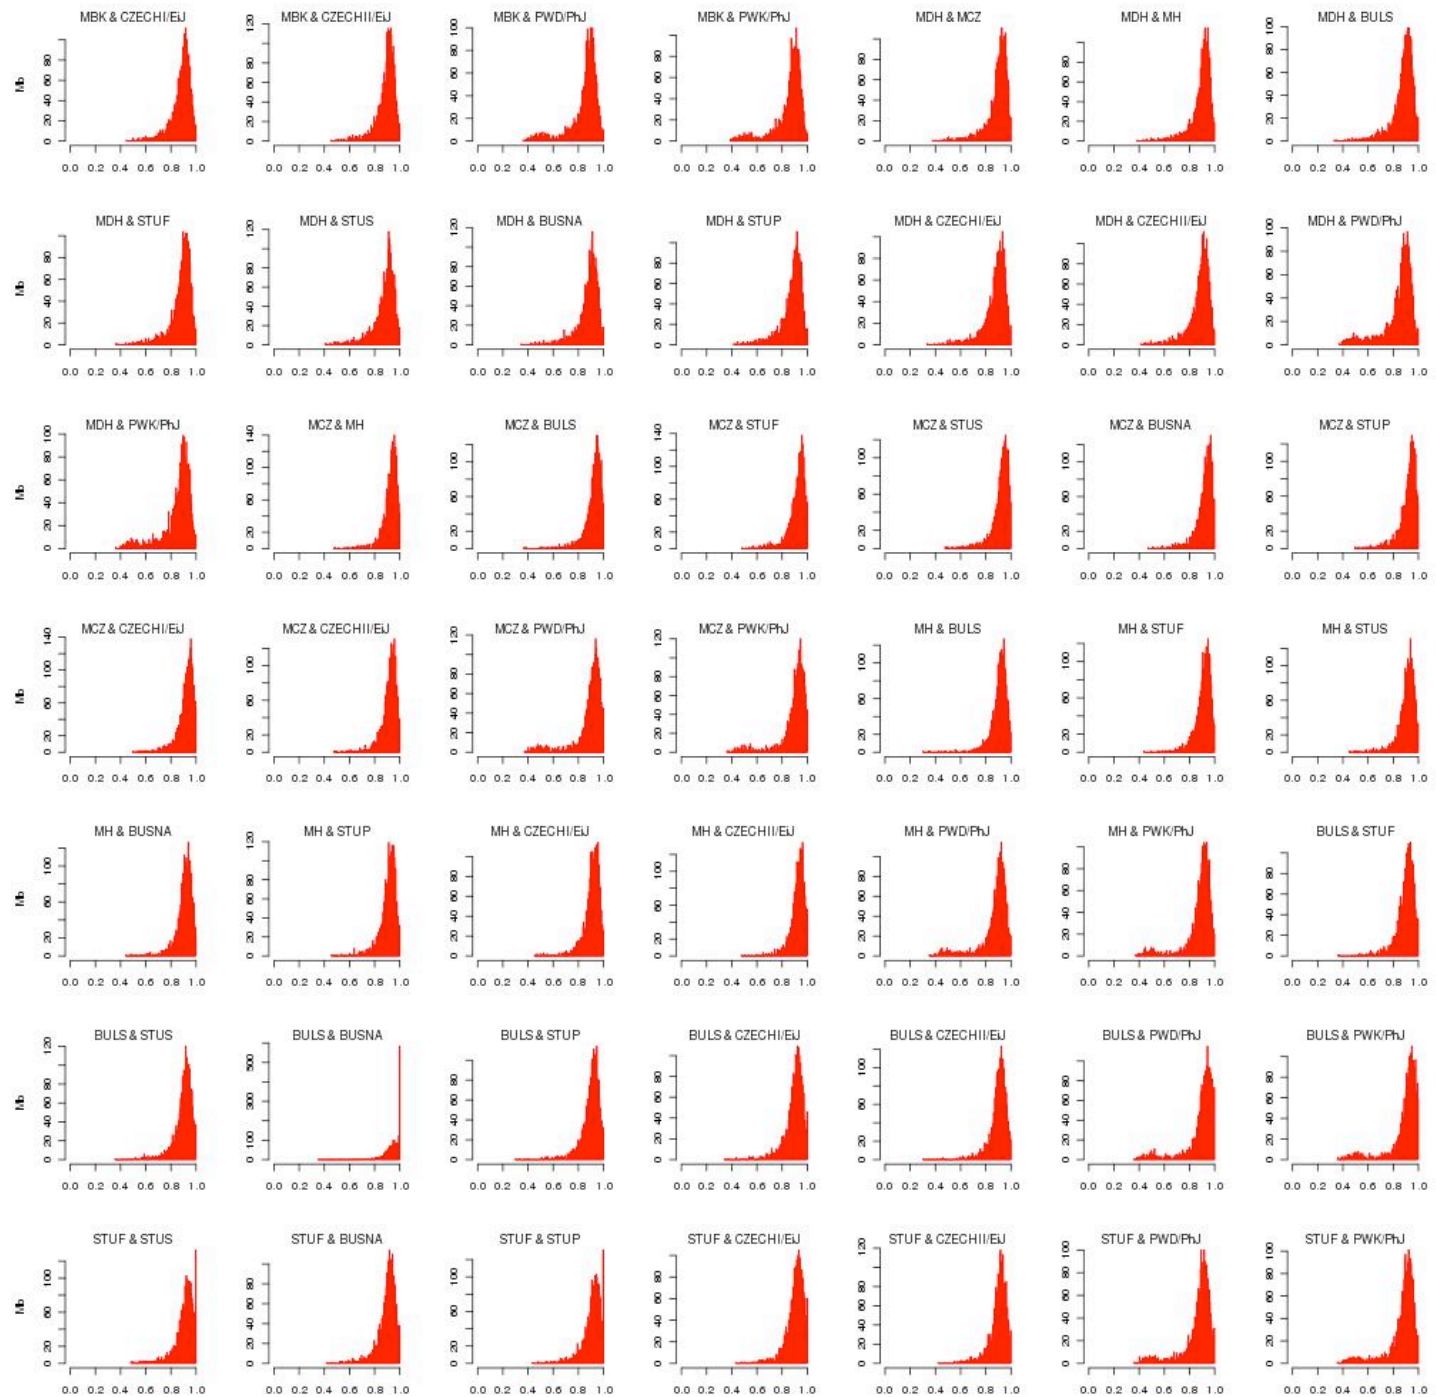



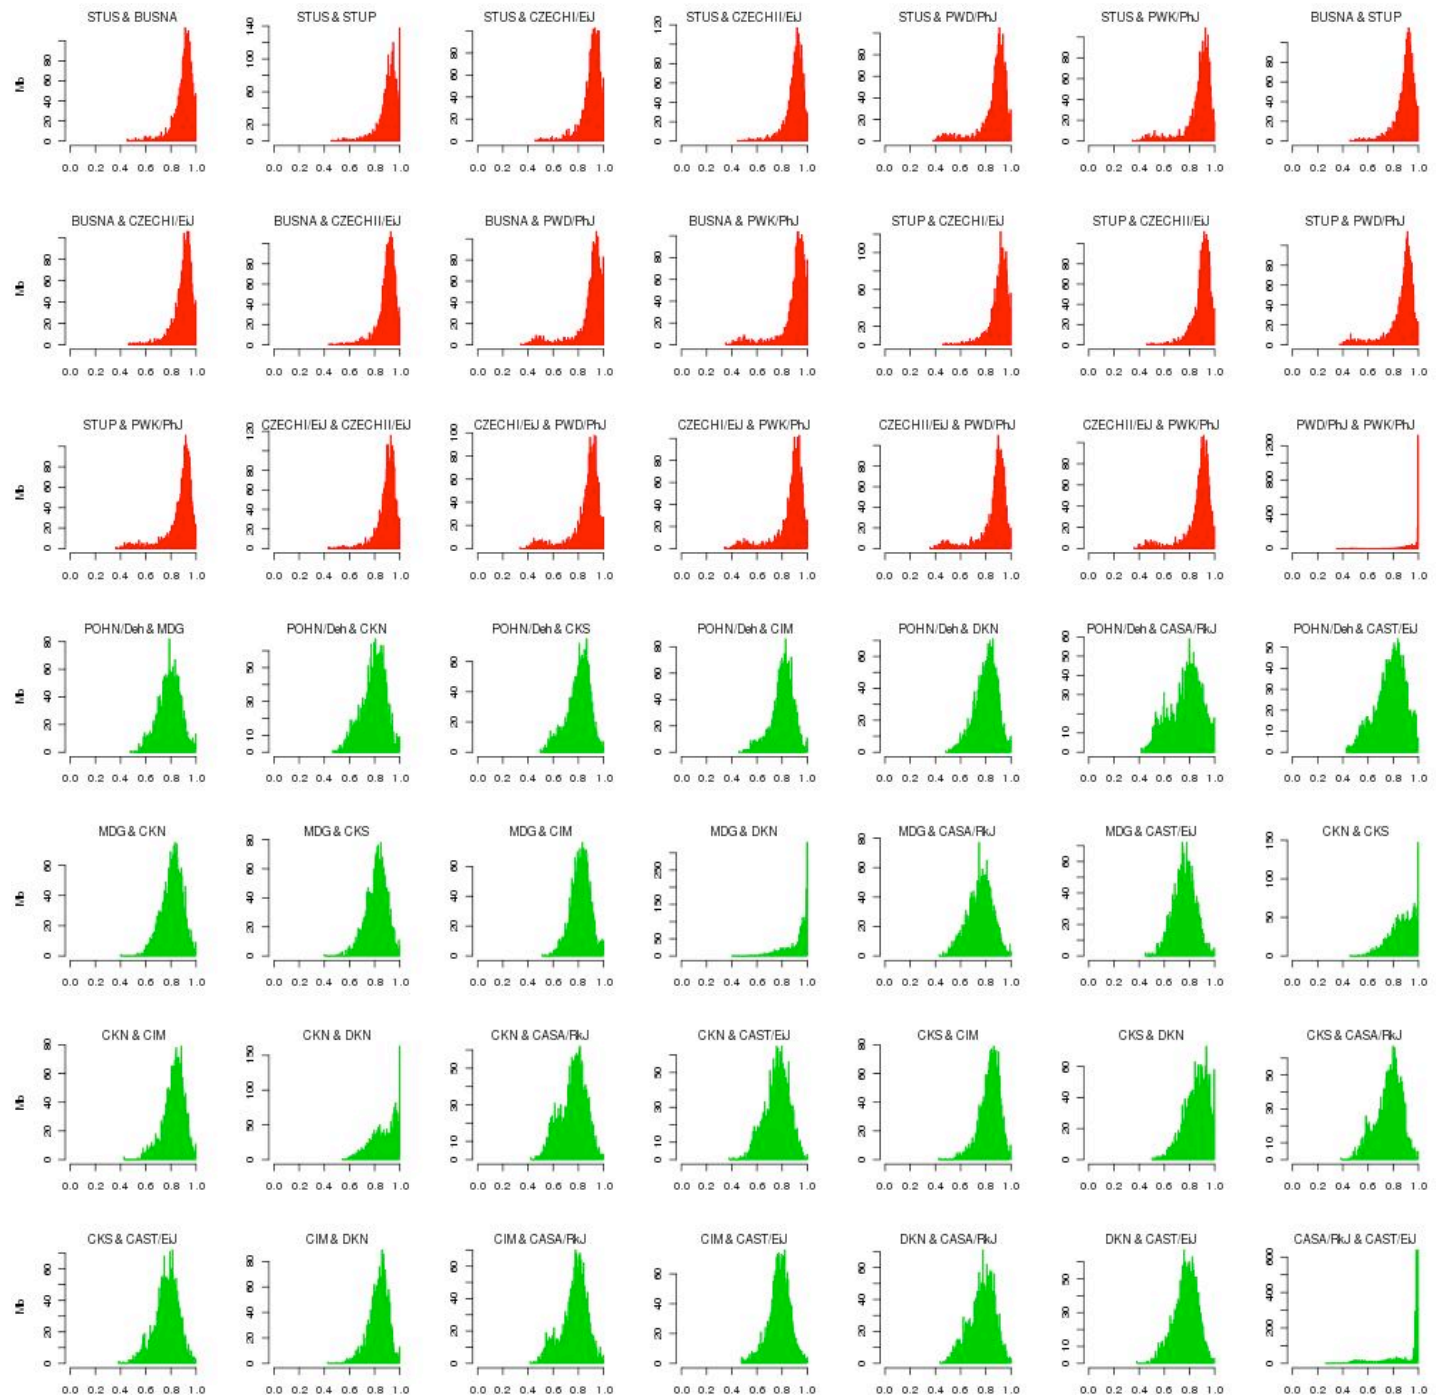

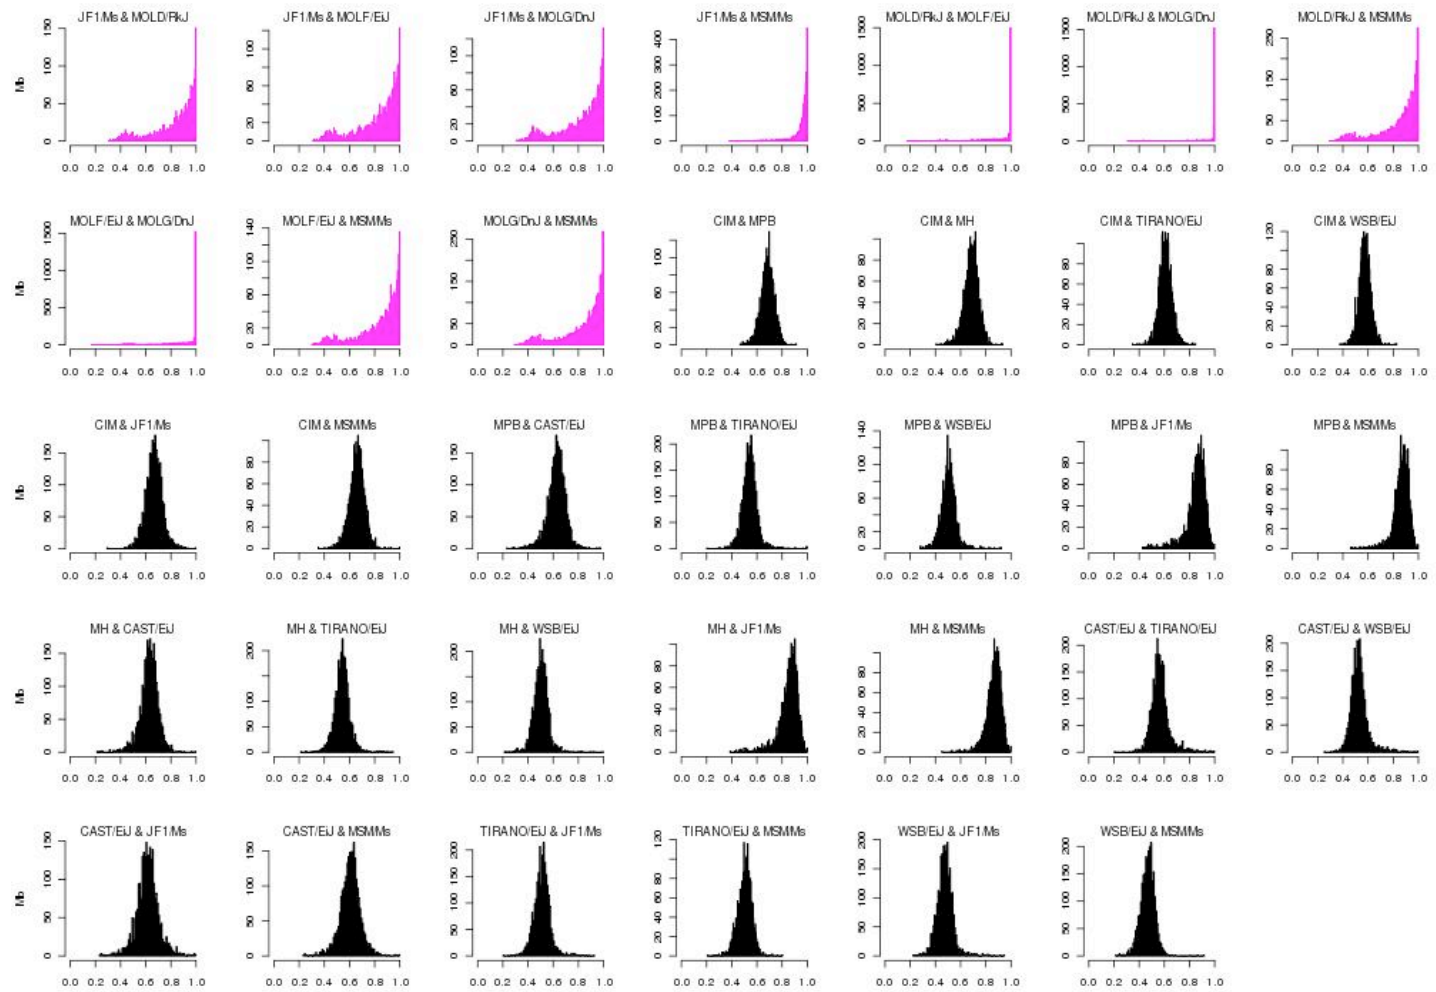



**Supplementary Figure 7.** A) Phylogenetic tree of the Y chromosome. Numbers denote the following samples: **1)** 22MO, BIK/g, BZO, CALB/RkJ, CKN, DIK, DJO, DKN, MOR/RkJ, MWN1026, RBA/DnJ, WLA and WMP; **2)** CKS; **3)** DDO, DMZ, DEB, STLT, STRA, STRB, PERA/EiJ, PERC/EiJ, MOLD/RkJ, MOLF/EiJ, MOLG/DnJ, ALS/LtJ, BTBRT+tf/J, BUB/BnJ, DDY/JclSidSeyFrkJ, FVB/NJ, NOD/ShiLtJ, NON/ShiLtJ, NONcNZO10/LtJ, NONcNZO5/LtJ, SJL/Bm, ST/bJ, SWR/J and TALLYHO/JngJ; **4)** SJL/J; **5)** ALR/LtJ; **6)** NOR/LtJ; **7)** KCT222; **8)** DOT, AKR/J, BPN/3J, MRL/MpJ, PN/nBSwUmabJ, RF/J, IBWSR2, ICOLD2 and IHOT1; **9)** LEWES/EiJ; **10)** WSB/EiJ; **11)** DCP; **12)** MWN1194, MWN1198, MWN1279, DCA, DGA, RBF/DnJ, TIRANO/EiJ and ZALENDE/EiJ; **13)** SOD1/EiJ; **14)** POHN/Deh; **15)** CASA/RkJ and CAST/EiJ; **16)** SF/CamEiJ, BPH/2J, BXB/MpJ, C3HeB/FeJ, CBA/CaJ, CBA/J, DBA/1LacJ, DBA/2HaSmnJ, DBA/2J and RSV/LeJ; **17)** C3H/HeJ; **18)** JF1/Ms, SB/LeJ and STX/Le; **19)** DBA/1J; **20)** 129S6; **21)** MSM/Ms, ILS and ISS; **22)** C57BL/6CR and IHOT2; **23)** 129S1SvImJ; **24)** BALB/cJ; **25)** C57BL/10J; **26)** A/J; **27)** RBB/DnJ, 129P1/ReJ, 129P3, 129T2/SvEmsJ, 129X1/SvJ, A/WySnJ, AEJ/GnLeJ, AEJ/GnRk, BALB/cByJ, BDP/J, BPL/1J, C57BL/10ScNJ, C57BL/10ScSnJ, C57BL/6J, C57BL/6NCI, C57BL/6Tc, C57BLKS/J, C57BR/cdJ, C57L/J, C58/J, CE/J, CHMU/LeJ, DLS/LeJ, EL/SuzSeyFrkJ, HPG/BmJ, I/LnJ, JE/LeJ, KK/HIJ, LG/J, LP/J, LT/SvEiJ, NU/J, NZB/BINJ, NZL/LtJ, NZM2410/J, NZO/HILtJ, NZW/LacJ, P/J, RHJ/LeJ, RIIS/J, SEA/GnJ, SEC/1GnLeJ, SEC/1ReJ, SH1/LeJ, SI/ColTyrp1Dnahc11/J, SM/J, SSL/LeJ, TKDU/DnJ, TSJ/LeJ, YBR/EiJ and ZRDCTRaxChUmdJ; **28)** MGA, Yu2115 and Yu2097; **29)** Yu2113; **30)**

SKIVE/EiJ, BAG74, BAG56, STUP, STUS, STUF, MDGI, MCZ, MDH, MPB, MBK and MBS; **31)** PWK/PhJ, PWD/PhJ, CZECHI/EiJ, BAG99, BUSNA, BULS and MH; **32)** CZECHII/EiJ; **33)** MDG; **34)** IN13, IN17, IN25, IN34, IN47 and IN60; **35)** CIM. B) Phylogenetic tree of the mitochondrial genome. Numbers denote the following samples: **1)** CAST/EiJ, CIM, CKS, CKN and POHN/Deh; **2)** IN17 and IN47; **3)** IN60; **4)** IN25 and IN54; **5)** IN34; **6)** IN38; **7)** IN40; **8)** IN13; **9)** IN59; **10)** DKN and MDG; **11)** DGA; **12)** BIK/g, DIK and SKIVE/EiJ; **13)** MWN1106 and WMP; **14)** MWN1279, MBS, MDH and MDGI ; **15)** KCT222; **16)** MWN1194, MWN1214, 22MO, DCA and SF/Cam/EiJ; **17)** PERA/EiJ and PERC/EiJ; **18)** TIRANO/EiJ and ZALENDE/EiJ; **19)** IS/CamRkJ; **20)** DCP; **21)** RDS12763, MWN1030, MWN1198, DJO and WLA; **22)** MWN1026; **23)** MWN1287, RBB/DnJ, NZB/BINJ, NZL/LtJ, NZM2419/J and NZO/HiLtJ; **24)** C57BL/10ScSnJ; **25)** BZO; **26)** DOT, DDO, DMZ, DEB, STLT ,STRA, STRB, CASA/RkJ, LEWES/EiJ ,MOR/RkJ, RBA/DnJ, RBF/DnJ, SOD1/EiJ, WSB/EiJ, CALB/RkJ, MOLD/RkJ, MOLG/DnJ, 129P1/ReJ, 129P3/J, 129S6, 129S1SvImJ, 129T2/SvEmsJ, 129X1/SvJ, A/J, A/WySnJ, AEJ/GnLeJ, AEJ/GnRk, AKR/J, ALR/LtJ, ALS/LtJ, BALB/cByJ, BALB/cJ, BDP/J, BPH/2J, BPL/1J, BPN/3J, BTBRT+tf/J, BUB/BnJ, BXSB/MpJ, C3H/HeJ, C3HeB/FeJ, C57BL/10J, C57BL/10ScNJ, C57BL/6CR, C57BL/6J, C57BL/6NCI, C57BL/6Tc, C57BLKS/J, C57BR/cdJ, C57L/J, C58/J, CBA/CaJ, CBA/J, CE/J, CHMU/LeJ, DBA/1J, DBA/1LacJ, DBA/2DeJ, DBA/2HaSmnJ, DBA/2J, DDK/Pas, DDY/JclSidSeyFrkJ, DLS/LeJ, EL/SuzSeyFrkJ, FVB/NJ, HPG/BmJ, I/LnJ, JE/LeJ, KK/HIJ, LG/J, LP/J, LT/SvEiJ, MRL/MpJ, NOD/ShiLtJ, NON/ShiLtJ, NONcNZO10/LtJ, NONcNZO5/LtJ,

NOR/LtJ, NU/J, NZW/LacJ, P/J, PL/J, PN/nBSwUmabJ, RF/J, RHJ/LeJ, RIIS/J, RSV/LeJ, SB/LeJ, SEA/GnJ, SEC/1GnLeJ, SEC/1ReJ, SH1/LeJ, SI/ColTyrp1Dnahc11/J, SJL/Bm, SJL/J, SM/J, SSL/LeJ, ST/bJ, STX/Le, SWR/J, TALLYHO/JngJ, TKDU/DnJ, TSJ/LeJ, YBR/EiJ, ZRDCTRaxChUmdJ, IBWSP2, IBWSR2, ICOLD2, IHOT1, IHOT2, ILS and ISS; **27)** Yu2095; **28)** BAG3, BAG94, Yu2115, Yu2099 Yu2097, CZECHII/EiJ and MH,; **29)** BAG99; **30)** Yu2113; **31)** BAG102, RDS10105, Yu2116, JF1/Ms, MBK, MOLF/EiJ and MSM/Ms; **32)** RDS13554, MPB and Yu2120; **33)** BAG56; **34)** BAG68; **35)** BAG74; **36)** MGA, **37)** BULS, BUSNA, CZECHI/EiJ, PWK/PhJ, PWD/PhJ, STUP, STUS and STUF ; **38)** MCZ. Note the significant differences between the known subspecific origin of the strains and their mitochondrial and Y chromosome genomes. For example, CASA/RkJ is a *M. m. castaneus* strain with a *M. m. domesticus* mitochondria; MOLD/RkJ and MOLG/DnJ are *M. m. molossinus* strains with *M. m. domesticus* mitochondria and Y chromosomes; MOLF/EiJ is a *M. m. molossinus* strain with a *M. m. domesticus* Y chromosome; CKN, DKN and CKS are *M. m. castaneus* strains with *M. m. domesticus* Y chromosomes and, RBB/DnJ is *M. m. domesticus* strains with a *M. m. musculus* Y chromosome.

A

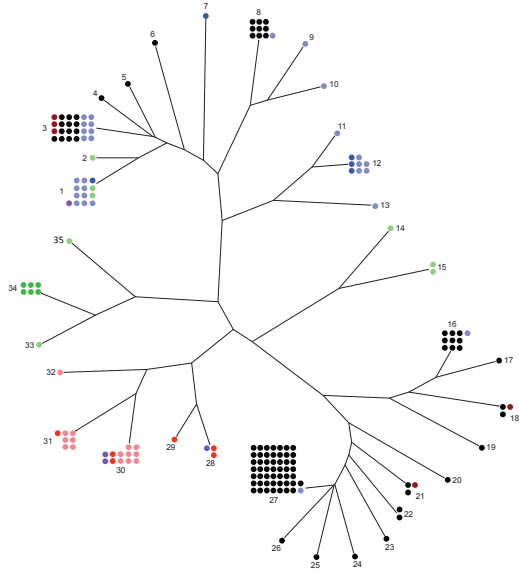

B

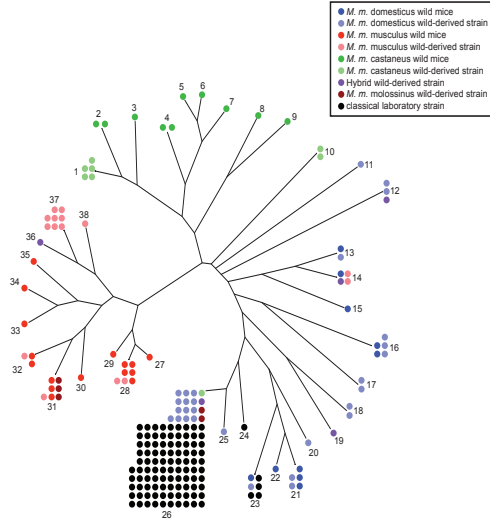

**Supplementary Figure 8.** Subspecific assignment. A, Proportion of diagnostic alleles in wild caught mice in every 500K window. The proportion simplex, and the center (0.47, 0.32, 0.21) matches the number of informative sets reported in the results. B, Proportion of diagnostic allele in laboratory strains. Subspecific assignment was performed based on HMM. The figure shows the diagnostic allele score from the corresponding assignment window. C, Frequency distribution of the p-value from goodness of fit test using laboratory strains. For each wild-derived and classical strain, we calculated the diagnostic allele score, and compared it to the center proportion (0.47, 0.32, 0.21). D, distribution of diagnostic alleles in 10Mb window of chromosome 1 for 12 samples. Each bar represents the presence of diagnostic allele in that sample. The height of each bar represents the diagnostic score for that allele while the color represent the subspecies (*M. m. domesticus* (blue), *M. m. musculus* (red) and *M. m. castaneus* (green)). Horizontal lines represent the subspecific assignments.

A

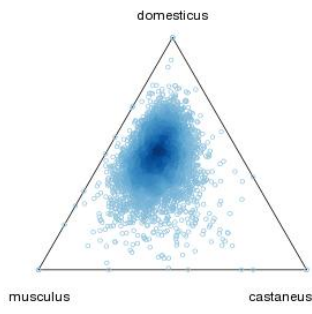

B

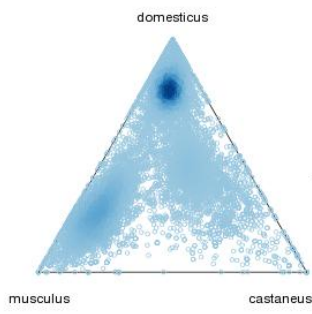

C

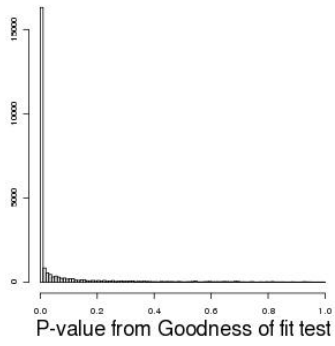

D

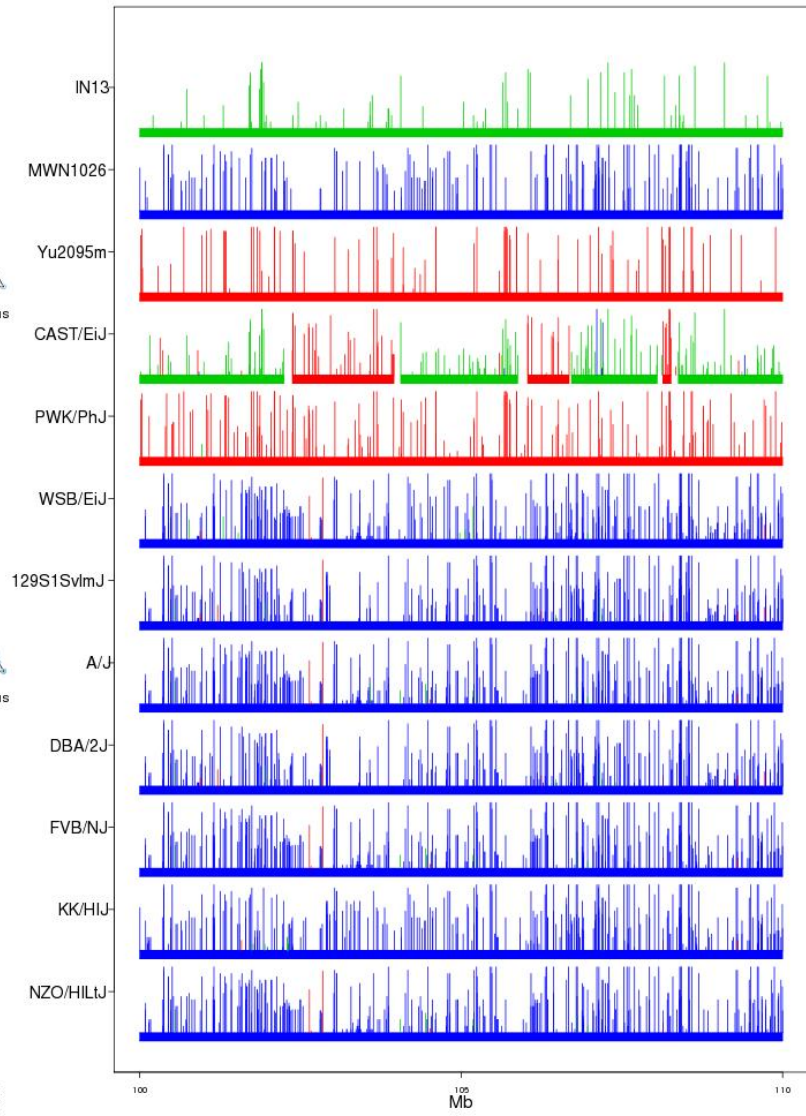

**Supplementary Figure 9.** Concordance between intersubspecific introgression in wild-derived strains identified in this and a previous study<sup>5</sup>. Black bars denote regions of introgression identified previously. Blue, red and green bars denote the subspecific origin of the corresponding region. In each chromosome CAST/EiJ, PWD/PhJ and WSB/EiJ data are depicted from bottom to top and within each strain current data are on top and prior results on the bottom.

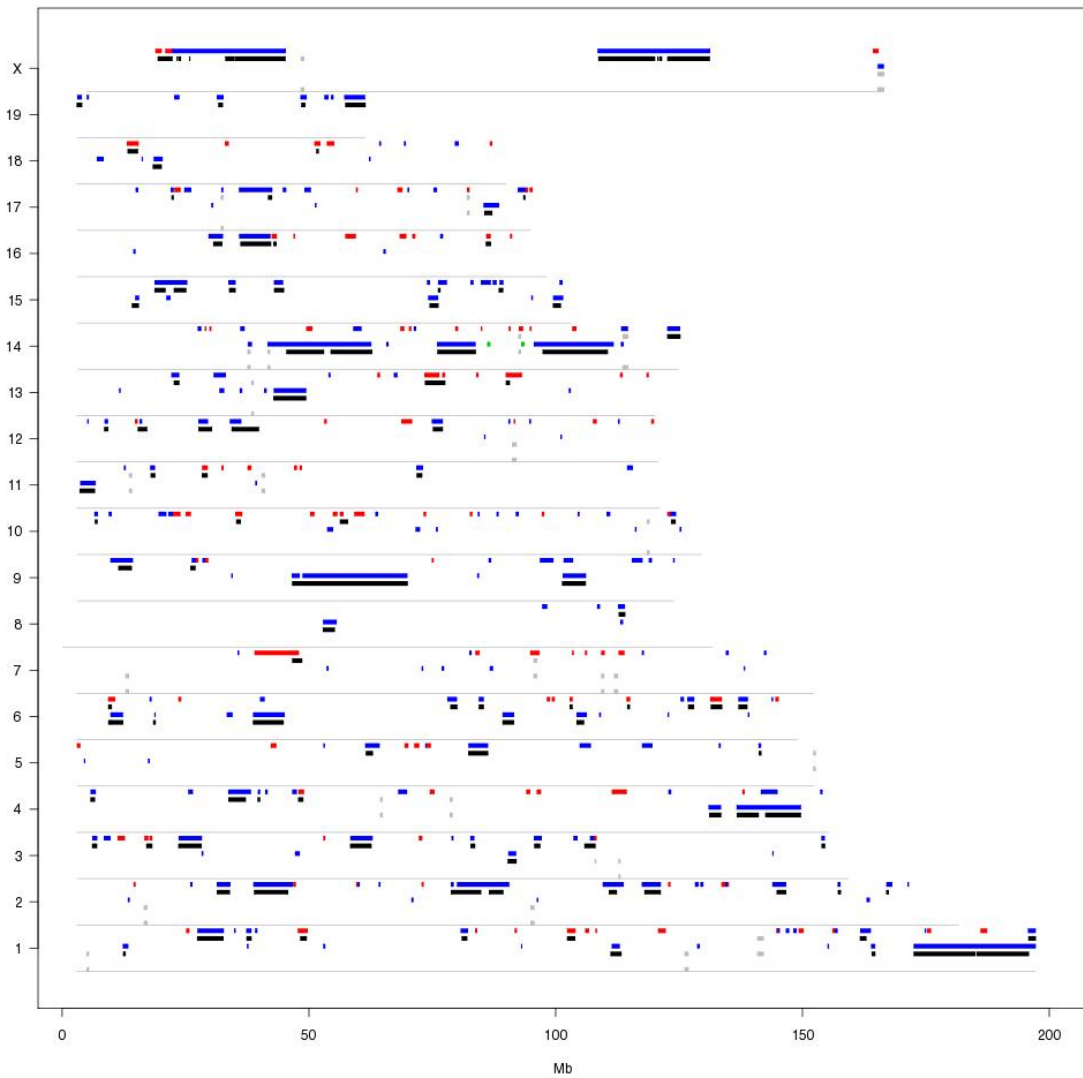

**Supplementary Figure 10.** Spatial distribution of haplotype diversity in classical inbred strains. A) Average genotype identity among classical inbred strains. B) Total length of the distance tree. Both figures are based on distance trees constructed on the basis of the genotype identity among strains from different cliques on each compatible interval.

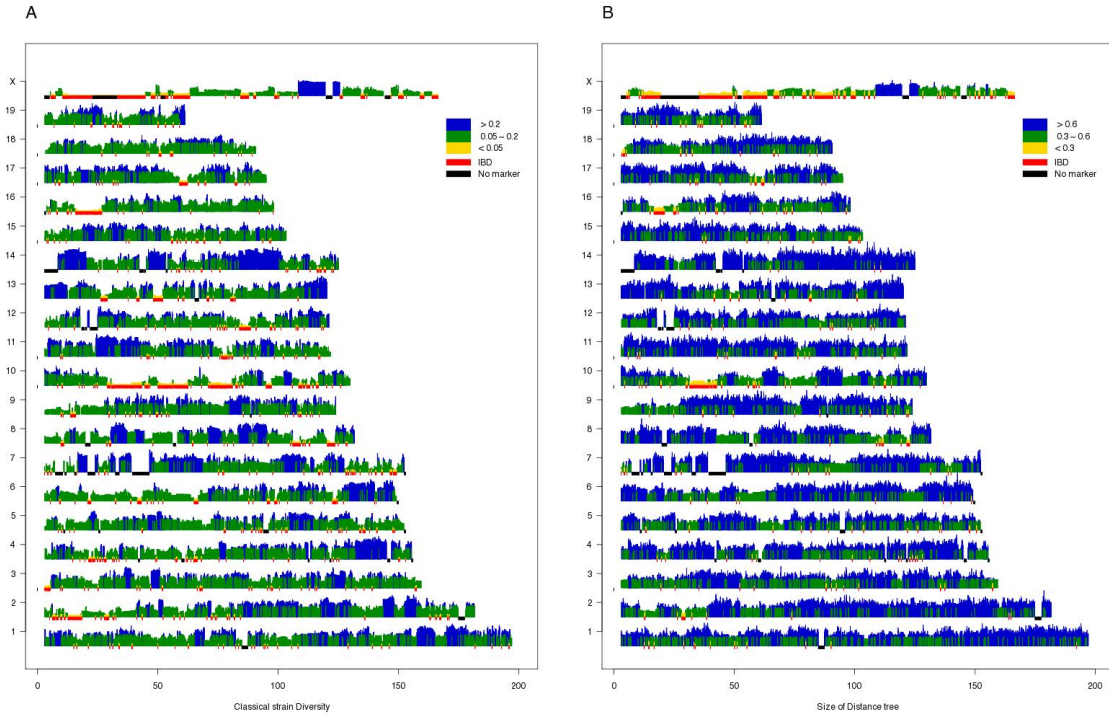

Supplement: NIHMS294325-supplement-1.pdf [file NIHMS294325-supplement-1.pdf]
